# Supplementary material
Source: HighWire-hosted journal article supplement (https://jitc.bmj.com/content/10/3/e003420)
Supplement: inline-supplementary-material-1 [file inline-supplementary-material-1.xlsx]

## Sheet: Table_S3
Supplementary Table S3. Top 1000 differentially methylated CpG sites
ID	Chromosome	Start	Strand	UCSC_RefGene_Name	UCSC_RefGene_Group	Relation_to_UCSC_CpG_Island	GencodeCompV12_Group	Direction
cg01096398	chr6	1312475	+	FOXQ1	TSS200	Island	TSS200	Hypo_in_Resp
cg21847720	chr8	2075777	+	MYOM2	Body	Island	TSS200	Hypo_in_Resp
cg26475948	chr22	46895349	+	CELSR1	Body	Open_sea	IGR	Hypo_in_Resp
cg00062382	chr4	86954451	-	MAPK10	Body	Open_sea	3'UTR	Hypo_in_Resp
cg26995506	chr2	145226929	-	ZEB2	Body	Open_sea	3'UTR	Hypo_in_Resp
cg17872757	chr11	128564180	-	FLI1	Body	Island	3'UTR	Hypo_in_Resp
cg17073989	chr1	90321453	-	LRRC8D	5'UTR	Open_sea	5'UTR	Hypo_in_Resp
cg00501779	chr11	62369394	-	MTA2	TSS200	Island	TSS1500	Hypo_in_Resp
cg25303761	chr1	31256028	-	NA	NA	Open_sea	IGR	Hyper_in_Resp
cg08794954	chr11	79124571	+	ODZ4	5'UTR	Open_sea	5'UTR	Hypo_in_Resp
cg09016212	chr12	52400640	+	GRASP	TSS200	Island	TSS200	Hyper_in_Resp
cg17730961	chr7	134247087	-	AKR1B15	5'UTR	Open_sea	5'UTR	Hypo_in_Resp
cg06386517	chr7	50860866	+	GRB10	5'UTR	N_Shore	TSS1500	Hypo_in_Resp
cg13135286	chr1	218302163	-	U1	NA	Open_sea	TSS1500	Hypo_in_Resp
cg12075720	chr19	17799037	-	UNC13A	TSS200	Island	1stExon	Hyper_in_Resp
cg27188664	chr3	149815631	-	RP11-167H9.4	NA	Open_sea	TSS200	Hypo_in_Resp
cg05531181	chr9	23672628	-	LOC101929563	TSS1500	Open_sea	TSS1500	Hypo_in_Resp
cg19960459	chr5	21774852	+	CDH12	Body	Open_sea	5'UTR	Hypo_in_Resp
cg11508413	chr13	28365853	+	GSX1	TSS1500	N_Shore	TSS1500	Hyper_in_Resp
cg08603678	chr8	109235928	-	EIF3E	Body	Open_sea	3'UTR	Hypo_in_Resp
cg16850897	chr7	100343110	-	ZAN	Body	Open_sea	5'UTR	Hypo_in_Resp
cg21691076	chr9	130877541	+	SLC25A25-AS1	Body	Open_sea	3'UTR	Hypo_in_Resp
cg02627872	chr1	229260510	-	NA	NA	Open_sea	IGR	Hypo_in_Resp
cg17352540	chr13	28365723	-	GSX1	TSS1500	Island	TSS1500	Hyper_in_Resp
cg00280928	chr7	130792996	+	LINC-PINT	TSS1500	S_Shore	TSS1500	Hypo_in_Resp
cg23807113	chr3	182088924	+	NA	NA	Open_sea	IGR	Hypo_in_Resp
cg00194869	chr5	153593984	+	GALNT10	Body	Open_sea	5'UTR	Hypo_in_Resp
cg22329642	chr5	118733663	+	NA	NA	Open_sea	IGR	Hypo_in_Resp
cg00504457	chr19	7587803	+	MCOLN1	Body	Island	5'UTR	Hypo_in_Resp
cg20090108	chr11	88242488	+	GRM5	Body	Island	5'UTR	Hypo_in_Resp
cg03666441	chr17	7254671	+	KCTD11	TSS1500	Island	TSS1500	Hypo_in_Resp
cg11613875	chr9	27573889	-	C9orf72	TSS200	Island	TSS200	Hypo_in_Resp
cg16434510	chr8	129800022	+	NA	NA	Open_sea	IGR	Hypo_in_Resp
cg14559922	chr8	117436618	+	NA	NA	Open_sea	IGR	Hypo_in_Resp
cg26843469	chr11	3013653	+	NAP1L4	TSS200	Island	TSS200	Hypo_in_Resp
cg19222778	chr17	37783613	+	PPP1R1B	5'UTR	Island	5'UTR	Hyper_in_Resp
cg03521044	chr7	20838564	+	NA	NA	S_Shore	IGR	Hyper_in_Resp
cg24886277	chr6	26331217	+	NA	NA	Open_sea	IGR	Hyper_in_Resp
cg21621538	chr7	24614206	+	MPP6	5'UTR	Open_sea	5'UTR	Hyper_in_Resp
cg14925271	chr6	132271987	-	CTGF	Body	Island	TSS200	Hypo_in_Resp
cg18425786	chr6	142410235	-	NMBR	TSS1500	S_Shore	TSS1500	Hyper_in_Resp
cg05226932	chr22	37720696	-	NA	NA	N_Shore	IGR	Hyper_in_Resp
cg24462021	chr7	102514737	-	FBXL13	Body	Open_sea	IGR	Hypo_in_Resp
cg08743107	chr9	91933643	-	SECISBP2	5'UTR	Island	5'UTR	Hypo_in_Resp
cg21101720	chr17	27940509	-	ANKRD13B	Body	Island	5'UTR	Hypo_in_Resp
cg19346203	chr14	63497196	+	KCNH5	Body	Open_sea	5'UTR	Hypo_in_Resp
cg09025601	chr14	37980809	+	MIPOL1	Body	Open_sea	IGR	Hypo_in_Resp
cg12798157	chr1	19600719	+	AKR7L	TSS200	Island	TSS200	Hypo_in_Resp
cg03249985	chr19	36545183	+	WDR62	TSS1500	Island	TSS1500	Hypo_in_Resp
cg03323911	chr1	236557247	+	EDARADD	TSS1500	N_Shore	TSS1500	Hypo_in_Resp
cg23099839	chr8	2585976	+	RP11-134O21.1	NA	Open_sea	1stExon	Hypo_in_Resp
cg08397053	chr3	171222492	+	U6	NA	Open_sea	TSS1500	Hyper_in_Resp
cg17705424	chr6	112078644	-	FYN	5'UTR	Open_sea	3'UTR	Hypo_in_Resp
cg14241836	chr7	48124921	-	NA	NA	N_Shelf	IGR	Hypo_in_Resp
cg19075208	chr5	94890810	-	ARSK	TSS200	Island	TSS1500	Hypo_in_Resp
cg11782550	chr22	21319668	-	AIFM3	5'UTR	Island	5'UTR	Hyper_in_Resp
cg02018277	chr15	65116255	-	PIF1	Body	Island	3'UTR	Hypo_in_Resp
cg11610626	chr6	128222053	+	THEMIS	5'UTR	Open_sea	1stExon	Hypo_in_Resp
cg16201963	chr11	27528006	-	BDNFOS	TSS1500	Island	TSS1500	Hypo_in_Resp
cg13908454	chr13	73909590	-	NA	NA	Open_sea	IGR	Hypo_in_Resp
cg09706833	chr21	46824938	+	COL18A1	TSS200	Island	TSS200	Hyper_in_Resp
cg14773822	chr17	75471246	-	2009-09-01	Body	Open_sea	TSS200	Hypo_in_Resp
cg05901579	chr15	88800567	-	NTRK3	TSS1500	Island	TSS1500	Hyper_in_Resp
cg18826787	chr20	443364	-	TBC1D20	TSS200	Island	TSS200	Hypo_in_Resp
cg04177989	chr13	81801775	-	LINC00564	TSS1500	Open_sea	TSS1500	Hypo_in_Resp
cg05026613	chr13	73995180	+	LINC00393	NA	Open_sea	3'UTR	Hypo_in_Resp
cg09994678	chr5	157030768	+	NA	NA	Open_sea	IGR	Hypo_in_Resp
cg05324121	chr14	50988384	+	MAP4K5	Body	Open_sea	5'UTR	Hypo_in_Resp
cg15508761	chr6	143141425	-	HIVEP2	5'UTR	Open_sea	5'UTR	Hypo_in_Resp
cg17279142	chr2	143591891	+	NA	NA	Open_sea	IGR	Hypo_in_Resp
cg02030187	chr1	116383634	+	NHLH2	1stExon	S_Shore	1stExon	Hyper_in_Resp
cg27113430	chr1	48964315	-	NA	NA	Open_sea	IGR	Hyper_in_Resp
cg07848310	chr5	43603786	-	NNT	5'UTR	S_Shore	5'UTR	Hyper_in_Resp
cg04609859	chr17	46655736	-	HOXB4	1stExon	S_Shore	5'UTR	Hyper_in_Resp
cg15690347	chr19	50931515	+	SPIB	Body	Island	IGR	Hypo_in_Resp
cg17671621	chr2	242077496	+	PASK	ExonBnd	Open_sea	3'UTR	Hypo_in_Resp
cg08572016	chr2	121494295	-	GLI2	NA	Island	5'UTR	Hypo_in_Resp
cg17265961	chr3	173871974	+	NLGN1	Body	Open_sea	5'UTR	Hypo_in_Resp
cg13593941	chr10	32217898	-	ARHGAP12	TSS200	Island	TSS200	Hypo_in_Resp
cg02952711	chr10	134145586	+	LRRC27	TSS200	Island	TSS200	Hypo_in_Resp
cg14942092	chr10	133787629	+	BNIP3	Body	Open_sea	IGR	Hypo_in_Resp
cg13464717	chr19	2269532	-	OAZ1	5'UTR	Island	5'UTR	Hyper_in_Resp
cg18860449	chr2	30488769	+	NA	NA	Open_sea	IGR	Hypo_in_Resp
cg01741606	chr22	34199319	+	LARGE	5'UTR	Open_sea	3'UTR	Hypo_in_Resp
cg13379419	chr19	50833943	+	KCNC3	TSS1500	Island	5'UTR	Hyper_in_Resp
cg25045526	chr7	121944506	-	FEZF1	1stExon	Island	TSS1500	Hyper_in_Resp
cg13570892	chr15	45449437	-	DUOX1	Body	Open_sea	3'UTR	Hypo_in_Resp
cg13409244	chr4	166137159	+	KLHL2	5'UTR	Open_sea	5'UTR	Hypo_in_Resp
cg13110046	chr4	2845573	-	ADD1	TSS1500	Island	TSS1500	Hypo_in_Resp
cg23264018	chr9	37343114	-	ZCCHC7	Body	Open_sea	5'UTR	Hypo_in_Resp
cg22988507	chr4	2936131	+	C4orf10	TSS1500	Island	3'UTR	Hypo_in_Resp
cg00041030	chr14	91694672	+	NA	NA	Open_sea	IGR	Hypo_in_Resp
cg22061957	chr2	27861006	-	GPN1	Body	Open_sea	3'UTR	Hypo_in_Resp
cg02746014	chr19	54959839	-	LENG8-AS1	Body	N_Shore	3'UTR	Hyper_in_Resp
cg20419735	chr17	46824292	+	NA	NA	N_Shore	IGR	Hyper_in_Resp
cg22033277	chr8	21645785	+	GFRA2	1stExon	Island	1stExon	Hypo_in_Resp
cg21882416	chr10	112117365	-	NA	NA	Open_sea	IGR	Hypo_in_Resp
cg03014019	chr7	70113224	-	AUTS2	Body	Open_sea	IGR	Hypo_in_Resp
cg27467876	chr8	22266134	-	SLC39A14	Body	Open_sea	IGR	Hyper_in_Resp
cg06906472	chr2	107502801	-	ST6GAL2	TSS200	Island	1stExon	Hypo_in_Resp
cg16237343	chr18	46254892	-	CTIF	Body	Open_sea	IGR	Hypo_in_Resp
cg10084487	chr10	48481599	+	NA	NA	Open_sea	IGR	Hypo_in_Resp
cg09905051	chr5	37454641	+	WDR70	Body	Open_sea	5'UTR	Hypo_in_Resp
cg26459874	chr4	95687633	+	BMPR1B	5'UTR	Open_sea	5'UTR	Hypo_in_Resp
cg11444278	chr13	28365587	+	GSX1	TSS1500	Island	TSS1500	Hyper_in_Resp
cg22297146	chr15	48470516	-	MYEF2	5'UTR	Island	1stExon	Hyper_in_Resp
cg10340048	chr8	74258684	+	RP11-434I12.2	NA	Open_sea	3'UTR	Hypo_in_Resp
cg17641445	chr16	50229272	-	PAPD5	Body	Open_sea	5'UTR	Hypo_in_Resp
cg10823511	chr7	141630634	+	CLEC5A	Body	Open_sea	3'UTR	Hypo_in_Resp
cg25048751	chr12	107297185	+	NA	NA	Open_sea	IGR	Hyper_in_Resp
cg22545525	chr9	131266982	-	GLE1	5'UTR	Island	TSS200	Hypo_in_Resp
cg16270885	chr7	48130197	-	UPP1	5'UTR	S_Shore	5'UTR	Hypo_in_Resp
cg20225766	chr3	111414672	-	PLCXD2	Body	Open_sea	5'UTR	Hypo_in_Resp
cg02834732	chr4	139734399	+	AC093766.1	NA	Open_sea	TSS1500	Hypo_in_Resp
cg20551181	chr11	20620920	+	SLC6A5	TSS200	N_Shore	TSS1500	Hyper_in_Resp
cg13769834	chr17	46713962	-	RP11-357H14.20	NA	Island	3'UTR	Hyper_in_Resp
cg13992444	chr6	149368110	-	UST	Body	Open_sea	IGR	Hypo_in_Resp
cg07196514	chr1	158984321	-	IFI16	5'UTR	Open_sea	5'UTR	Hypo_in_Resp
cg11526752	chr2	175462540	-	WIPF1	5'UTR	Open_sea	TSS200	Hypo_in_Resp
cg13424484	chr10	63803474	+	ARID5B	Body	Open_sea	IGR	Hypo_in_Resp
cg12201043	chr7	156332978	+	C7orf4	TSS1500	Open_sea	3'UTR	Hypo_in_Resp
cg24793045	chr1	162660016	+	DDR2	5'UTR	Open_sea	5'UTR	Hypo_in_Resp
cg22071191	chr3	135954970	+	NA	NA	Open_sea	IGR	Hypo_in_Resp
cg07372166	chr9	79413666	+	PRUNE2	Body	Open_sea	5'UTR	Hypo_in_Resp
cg15387161	chr9	117798450	-	TNC	Body	Open_sea	TSS1500	Hypo_in_Resp
cg12499584	chr1	55681171	-	USP24	TSS200	Island	TSS1500	Hypo_in_Resp
cg25374269	chr13	44887281	+	NA	NA	Open_sea	IGR	Hypo_in_Resp
cg10146330	chr22	50482250	-	TTLL8	Body	N_Shore	IGR	Hypo_in_Resp
cg18141739	chr11	75379712	-	MAP6	TSS1500	Island	1stExon	Hypo_in_Resp
cg20320624	chr17	77216455	-	HRNBP3	5'UTR	Open_sea	5'UTR	Hyper_in_Resp
cg18294332	chr5	56148274	+	MAP3K1	Body	Open_sea	3'UTR	Hypo_in_Resp
cg22457641	chr4	164585200	-	2001-03-01	Body	Open_sea	3'UTR	Hypo_in_Resp
cg26960322	chr2	237479015	+	CXCR7	5'UTR	S_Shore	5'UTR	Hypo_in_Resp
cg15942003	chr17	38084581	-	ORMDL3	TSS1500	S_Shore	TSS1500	Hyper_in_Resp
cg25741047	chr6	33359518	-	KIFC1	5'UTR	Island	5'UTR	Hypo_in_Resp
cg07290915	chr13	112718808	-	LINC00403	Body	N_Shore	IGR	Hyper_in_Resp
cg09607566	chr16	89367323	+	ANKRD11	Body	Open_sea	3'UTR	Hypo_in_Resp
cg17722675	chr6	133563382	-	EYA4	5'UTR	Island	5'UTR	Hyper_in_Resp
cg16113883	chr6	138190021	-	TNFAIP3	5'UTR	S_Shore	5'UTR	Hypo_in_Resp
cg01412404	chr3	14289162	-	NA	NA	Open_sea	IGR	Hypo_in_Resp
cg27324066	chr3	151839230	-	RP11-246A10.1	NA	Open_sea	3'UTR	Hypo_in_Resp
cg13310895	chr1	96836517	-	LOC101928241	Body	Open_sea	3'UTR	Hypo_in_Resp
cg10410146	chr7	44112411	+	POLM	3'UTR	Open_sea	3'UTR	Hypo_in_Resp
cg07923686	chr8	65491318	+	BHLHE22	TSS1500	Island	3'UTR	Hyper_in_Resp
cg11805424	chr1	223147973	-	DISP1	Body	Open_sea	5'UTR	Hypo_in_Resp
cg10498434	chr17	37783488	+	PPP1R1B	1stExon	Island	5'UTR	Hyper_in_Resp
cg03645000	chr7	102454666	+	FBXL13	Body	Open_sea	3'UTR	Hypo_in_Resp
cg25729662	chr3	167940985	-	NA	NA	Open_sea	IGR	Hypo_in_Resp
cg00782174	chr19	47291626	-	SLC1A5	1stExon	Island	1stExon	Hyper_in_Resp
cg02771997	chr7	102475694	-	FBXL13	Body	Open_sea	IGR	Hypo_in_Resp
cg25641635	chr15	39704033	+	RP11-624L4.1	NA	Open_sea	3'UTR	Hypo_in_Resp
cg14248704	chr5	151470842	-	CTB-12O2.1	Body	Open_sea	5'UTR	Hypo_in_Resp
cg13677162	chr6	128214929	+	THEMIS	Body	Open_sea	5'UTR	Hypo_in_Resp
cg09899914	chr9	140172190	+	TOR4A	TSS200	N_Shore	TSS200	Hypo_in_Resp
cg10489650	chr18	3512188	-	DLGAP1	Body	Open_sea	IGR	Hyper_in_Resp
cg25559313	chr22	19138267	+	GSC2	TSS1500	Island	TSS1500	Hyper_in_Resp
cg24347323	chr1	63664613	+	LINC00466	NA	Open_sea	TSS200	Hypo_in_Resp
cg23207534	chr1	98512870	+	MIR137	TSS1500	S_Shore	TSS1500	Hypo_in_Resp
cg11029367	chr3	124705145	+	HEG1	Body	Open_sea	IGR	Hypo_in_Resp
cg01878345	chr2	105471960	-	POU3F3	TSS200	Island	TSS200	Hyper_in_Resp
cg21568106	chr2	66805366	+	AC007392.3	NA	S_Shore	5'UTR	Hyper_in_Resp
cg16535796	chr7	95472617	-	DYNC1I1	Body	Open_sea	5'UTR	Hypo_in_Resp
cg22746765	chr11	57480041	-	TMX2	5'UTR	Island	TSS200	Hypo_in_Resp
cg06102678	chr8	81491328	+	NA	NA	Island	IGR	Hyper_in_Resp
cg14764476	chr5	143138515	+	CTB-57H20.1	NA	Open_sea	5'UTR	Hypo_in_Resp
cg08249988	chr19	19322818	-	NCAN	1stExon	Island	5'UTR	Hyper_in_Resp
cg12232222	chr13	98825268	+	FARP1	5'UTR	N_Shelf	5'UTR	Hypo_in_Resp
cg18182981	chr6	1449399	+	NA	NA	Open_sea	IGR	Hypo_in_Resp
cg22774704	chr3	192372584	-	FGF12	Body	Open_sea	5'UTR	Hypo_in_Resp
cg24314564	chr3	188668940	+	TPRG1	NA	S_Shelf	5'UTR	Hypo_in_Resp
cg15225594	chr5	60148273	-	NA	NA	Open_sea	IGR	Hypo_in_Resp
cg03047785	chr14	77924332	-	C14orf133	TSS1500	Island	TSS1500	Hyper_in_Resp
cg08529255	chr8	120945985	-	DEPTOR	Body	Open_sea	IGR	Hypo_in_Resp
cg25202070	chr7	51384519	-	COBL	TSS200	Island	TSS1500	Hypo_in_Resp
cg03018496	chr15	96868989	-	NR2F2	TSS200	S_Shelf	TSS200	Hyper_in_Resp
cg03512945	chr14	101867429	-	NA	NA	Open_sea	IGR	Hyper_in_Resp
cg14959291	chr3	96532006	+	EPHA6	TSS1500	N_Shore	TSS1500	Hypo_in_Resp
cg24111955	chr7	64734226	-	NA	NA	N_Shore	IGR	Hyper_in_Resp
cg06290633	chr10	123844396	+	TACC2	Body	Open_sea	IGR	Hypo_in_Resp
cg10324316	chr1	18969266	+	PAX7	Body	N_Shore	IGR	Hyper_in_Resp
cg10678266	chr7	24614348	+	MPP6	5'UTR	Open_sea	5'UTR	Hyper_in_Resp
cg10337377	chr16	55746561	-	NA	NA	Open_sea	IGR	Hyper_in_Resp
cg22127962	chr5	176236403	+	UNC5A	TSS1500	N_Shore	TSS1500	Hyper_in_Resp
cg00894075	chr14	101867474	+	NA	NA	Open_sea	IGR	Hyper_in_Resp
cg21006514	chr9	116139446	+	HDHD3	TSS1500	S_Shore	TSS1500	Hypo_in_Resp
cg26386402	chr9	115512612	-	SNX30	TSS1500	Island	3'UTR	Hyper_in_Resp
cg09053680	chr10	135044114	+	UTF1	1stExon	Island	1stExon	Hyper_in_Resp
cg18497394	chr8	38854070	+	TM2D2	TSS200	Island	TSS1500	Hypo_in_Resp
cg17592360	chr1	119543590	+	RP4-712E4.1	NA	N_Shore	3'UTR	Hyper_in_Resp
cg13040016	chr11	89224282	-	NOX4	Body	N_Shore	5'UTR	Hyper_in_Resp
cg27566048	chr3	167338838	+	WDR49	5'UTR	Open_sea	TSS1500	Hypo_in_Resp
cg12427262	chr12	65218246	-	TBC1D30	TSS200	Island	TSS1500	Hyper_in_Resp
cg08665853	chr5	141348202	+	RNF14	TSS1500	N_Shore	5'UTR	Hyper_in_Resp
cg20714110	chr3	137489672	+	RP11-2A4.3	NA	Island	TSS1500	Hypo_in_Resp
cg20775702	chr15	79165225	-	MORF4L1	1stExon	Island	TSS1500	Hypo_in_Resp
cg11735311	chr1	41832649	+	NA	NA	S_Shore	IGR	Hyper_in_Resp
cg00569347	chr3	100645951	+	ABI3BP	Body	Open_sea	TSS1500	Hypo_in_Resp
cg00436476	chr6	26240505	+	HIST1H4F	TSS200	N_Shore	TSS200	Hypo_in_Resp
cg01287173	chr2	36923444	-	VIT	TSS1500	Open_sea	TSS1500	Hypo_in_Resp
cg11756095	chr1	32410614	-	PTP4A2	NA	Island	TSS200	Hyper_in_Resp
cg10139326	chr6	125471124	-	TPD52L1	NA	N_Shelf	5'UTR	Hypo_in_Resp
cg04376123	chr7	73895109	+	GTF2IRD1	5'UTR	Island	5'UTR	Hypo_in_Resp
cg16625125	chr11	67397578	-	NUDT8	TSS200	Island	TSS200	Hypo_in_Resp
cg27234090	chr11	119251854	-	USP2	5'UTR	N_Shore	5'UTR	Hyper_in_Resp
cg14640661	chr1	29299015	+	EPB41	5'UTR	Open_sea	5'UTR	Hypo_in_Resp
cg23680451	chr10	3823790	-	KLF6	Body	Island	3'UTR	Hypo_in_Resp
cg12367009	chr18	55673626	+	NA	NA	Open_sea	IGR	Hypo_in_Resp
cg04339457	chr3	183145663	+	MCF2L2	Body	Island	5'UTR	Hyper_in_Resp
cg24594454	chr1	13839128	+	RP4-597A16.2	NA	N_Shore	TSS1500	Hyper_in_Resp
cg24420706	chr10	4574886	-	NA	NA	Open_sea	IGR	Hypo_in_Resp
cg10683668	chr6	138191600	+	TNFAIP3	5'UTR	S_Shelf	5'UTR	Hypo_in_Resp
cg04421583	chr8	63059337	+	NA	NA	S_Shore	IGR	Hypo_in_Resp
cg15208687	chr22	48766103	+	NA	NA	Open_sea	IGR	Hyper_in_Resp
cg05307536	chr16	79215429	-	WWOX	Body	Open_sea	3'UTR	Hypo_in_Resp
cg09807329	chr5	107970572	-	NA	NA	Open_sea	IGR	Hypo_in_Resp
cg10389812	chr15	99458162	-	IGF1R	Body	Open_sea	5'UTR	Hypo_in_Resp
cg16284459	chr7	91510405	-	MTERF	TSS1500	Island	TSS1500	Hypo_in_Resp
cg05102552	chr2	27650867	-	NRBP1	TSS1500	N_Shore	TSS1500	Hyper_in_Resp
cg03463994	chr2	189046152	-	AC068718.1	NA	Open_sea	3'UTR	Hypo_in_Resp
cg05009601	chr7	121944500	-	FEZF1	1stExon	Island	TSS1500	Hyper_in_Resp
cg03993320	chr8	142053875	-	NA	NA	Open_sea	IGR	Hypo_in_Resp
cg21490751	chr3	168268421	-	MIR551B	TSS1500	Open_sea	TSS1500	Hypo_in_Resp
cg19964826	chr2	182931518	+	PPP1R1C	Body	Open_sea	5'UTR	Hypo_in_Resp
cg04543208	chr14	50507176	+	LINC01599	Body	Open_sea	3'UTR	Hypo_in_Resp
cg12416303	chr15	72410485	+	SENP8	TSS200	Island	TSS1500	Hypo_in_Resp
cg14785479	chr22	20792535	+	SCARF2	TSS1500	Island	TSS1500	Hyper_in_Resp
cg07718055	chr9	71570472	+	LOC101927069	Body	Open_sea	IGR	Hypo_in_Resp
cg14308796	chr6	82462617	-	FAM46A	TSS200	Island	TSS1500	Hypo_in_Resp
cg23357995	chr1	210567246	-	HHAT	Body	Open_sea	IGR	Hypo_in_Resp
cg08692111	chr19	1737123	+	NA	NA	S_Shelf	IGR	Hyper_in_Resp
cg12874092	chr10	17271519	+	VIM	Body	Island	5'UTR	Hypo_in_Resp
cg12226009	chr10	91263650	+	SLC16A12	5'UTR	Open_sea	5'UTR	Hypo_in_Resp
cg24017719	chr9	125988540	+	STRBP	Body	Open_sea	5'UTR	Hypo_in_Resp
cg19614321	chr20	4804581	+	RASSF2	TSS1500	S_Shore	TSS1500	Hyper_in_Resp
cg25396287	chr7	17301295	-	NA	NA	Open_sea	IGR	Hypo_in_Resp
cg15939466	chr10	114207340	-	VTI1A	Body	S_Shore	5'UTR	Hypo_in_Resp
cg09726569	chr2	88606805	-	snoU13	NA	Open_sea	TSS200	Hypo_in_Resp
cg02911909	chr5	14992937	-	NA	NA	Open_sea	IGR	Hypo_in_Resp
cg13194738	chr1	169332649	-	NME7	5'UTR	Open_sea	3'UTR	Hypo_in_Resp
cg00859858	chr1	37944257	-	ZC3H12A	Body	S_Shelf	5'UTR	Hypo_in_Resp
cg05125667	chr10	73772762	+	CHST3	3'UTR	Open_sea	3'UTR	Hyper_in_Resp
cg10693587	chr6	57038202	-	LOC101927211	TSS1500	S_Shore	TSS1500	Hyper_in_Resp
cg24567196	chr3	18782489	+	AC105750.1	NA	Open_sea	5'UTR	Hypo_in_Resp
cg24189431	chr15	83956766	+	RP11-382A20.4	NA	S_Shelf	5'UTR	Hypo_in_Resp
cg04010004	chr1	89916628	+	NA	NA	Open_sea	IGR	Hypo_in_Resp
cg02471987	chr5	148170888	+	NA	NA	Open_sea	IGR	Hypo_in_Resp
cg10429523	chr6	125239911	+	STL	Body	Open_sea	3'UTR	Hypo_in_Resp
cg11303839	chr7	75405967	+	CCL26	5'UTR	Open_sea	5'UTR	Hypo_in_Resp
cg26174752	chr6	97285948	+	GPR63	TSS1500	S_Shore	TSS1500	Hyper_in_Resp
cg04469219	chr13	112760929	+	LINC00403	NA	Island	TSS1500	Hyper_in_Resp
cg13132358	chr12	86423111	+	MGAT4C	5'UTR	Open_sea	TSS1500	Hypo_in_Resp
cg23111778	chr14	53373001	+	FERMT2	Body	Open_sea	3'UTR	Hypo_in_Resp
cg13016773	chr12	72081013	+	TMEM19	Body	S_Shore	IGR	Hypo_in_Resp
cg10608681	chr5	37723176	+	WDR70	Body	Open_sea	5'UTR	Hypo_in_Resp
cg14286665	chr2	48132880	-	FBXO11	TSS200	N_Shore	TSS1500	Hypo_in_Resp
cg19119071	chr6	83904067	-	PGM3	TSS1500	S_Shore	5'UTR	Hyper_in_Resp
cg08899626	chr4	16900199	-	LDB2	1stExon	Open_sea	1stExon	Hyper_in_Resp
cg16527095	chr12	54383678	-	HOXC10	3'UTR	S_Shelf	5'UTR	Hyper_in_Resp
cg15089892	chr3	101568188	+	NFKBIZ	5'UTR	Island	TSS1500	Hypo_in_Resp
cg05779595	chr13	112836631	+	NA	NA	Open_sea	IGR	Hyper_in_Resp
cg24601404	chr2	197124825	+	LOC101927482	Body	Open_sea	TSS200	Hypo_in_Resp
cg27061207	chr19	39295928	-	LGALS4	Body	Open_sea	IGR	Hypo_in_Resp
cg08570243	chr2	110969853	-	NCRNA00116	Body	Island	3'UTR	Hypo_in_Resp
cg23213230	chr13	50570091	+	TRIM13	TSS1500	N_Shore	TSS1500	Hyper_in_Resp
cg01634612	chr15	23092545	+	NIPA1	NA	Open_sea	5'UTR	Hypo_in_Resp
cg11451379	chr1	236557466	-	EDARADD	TSS1500	N_Shore	TSS1500	Hypo_in_Resp
cg15731551	chr3	98681696	+	CTD-2021J15.1	NA	Open_sea	5'UTR	Hypo_in_Resp
cg21028981	chr3	192465728	+	FGF12	NA	Open_sea	5'UTR	Hypo_in_Resp
cg08675941	chr11	85394045	-	CREBZF	NA	Open_sea	TSS200	Hypo_in_Resp
cg15520372	chr11	114237801	+	LOC101928940	Body	Open_sea	3'UTR	Hyper_in_Resp
cg03183598	chr11	18813298	+	PTPN5	1stExon	Island	1stExon	Hyper_in_Resp
cg15936889	chr22	22390113	+	LL22NC03-23C6.13	NA	Open_sea	TSS1500	Hypo_in_Resp
cg09704159	chr15	48470321	-	MYEF2	1stExon	Island	1stExon	Hyper_in_Resp
cg07516023	chr1	48964317	-	NA	NA	Open_sea	IGR	Hyper_in_Resp
cg06633978	chr16	75353806	-	CFDP1	Body	Open_sea	3'UTR	Hypo_in_Resp
cg06188083	chr10	91093005	+	IFIT3	Body	Open_sea	5'UTR	Hypo_in_Resp
cg02719245	chr14	95624293	+	FLJ45244	Body	S_Shore	TSS1500	Hyper_in_Resp
cg24057558	chr17	212481	+	RPH3AL	NA	Open_sea	5'UTR	Hypo_in_Resp
cg16020672	chr19	18586017	+	ELL	Body	Open_sea	IGR	Hypo_in_Resp
cg22653139	chr2	73142088	+	EMX1	NA	N_Shore	TSS1500	Hyper_in_Resp
cg03054432	chr1	65721125	-	DNAJC6	NA	S_Shore	5'UTR	Hyper_in_Resp
cg04805131	chr1	158978812	-	IFI16	TSS1500	Open_sea	5'UTR	Hypo_in_Resp
cg14564793	chr9	98982105	+	NA	NA	Island	IGR	Hypo_in_Resp
cg02819464	chr2	74166092	+	DGUOK	Body	Open_sea	5'UTR	Hypo_in_Resp
cg00102886	chr6	168227102	+	MLLT4-AS1	Body	Island	3'UTR	Hypo_in_Resp
cg07920414	chr1	41094365	+	RIMS3	Body	Open_sea	IGR	Hypo_in_Resp
cg11594821	chr6	30458601	-	HLA-E	Body	S_Shore	5'UTR	Hypo_in_Resp
cg18693345	chr5	2754148	+	C5orf38	Body	Island	3'UTR	Hyper_in_Resp
cg21399014	chr1	170514882	+	GORAB	3'UTR	Open_sea	5'UTR	Hypo_in_Resp
cg25258812	chr8	42195612	+	POLB	TSS1500	N_Shore	TSS1500	Hypo_in_Resp
cg13199429	chr14	63670711	+	RHOJ	TSS1500	Open_sea	TSS1500	Hypo_in_Resp
cg02096552	chr1	223168232	+	DISP1	Body	Open_sea	ExonBnd	Hypo_in_Resp
cg07438711	chr7	39078387	+	POU6F2	Body	Open_sea	5'UTR	Hypo_in_Resp
cg22400059	chr1	10571508	-	PEX14	Body	Open_sea	5'UTR	Hypo_in_Resp
cg23048453	chr5	175613405	+	LOC643201	Body	Open_sea	TSS1500	Hypo_in_Resp
cg06364757	chr15	55881246	+	PYGO1	TSS200	S_Shore	TSS1500	Hyper_in_Resp
cg09254101	chr14	57361117	-	OTX2OS1	Body	Open_sea	TSS1500	Hypo_in_Resp
cg20952901	chr19	17403529	-	ABHD8	Body	Island	IGR	Hyper_in_Resp
cg11083416	chr3	128417359	-	NA	NA	Open_sea	IGR	Hypo_in_Resp
cg22358708	chr1	185126161	-	C1orf25	TSS200	Island	TSS1500	Hypo_in_Resp
cg17311132	chr12	88693546	-	NA	NA	Open_sea	IGR	Hypo_in_Resp
cg03886687	chr4	87281409	+	MAPK10	TSS200	Open_sea	TSS1500	Hyper_in_Resp
cg06346335	chr1	76489892	-	NA	NA	Open_sea	IGR	Hypo_in_Resp
cg19325152	chr2	9527430	+	ASAP2	Body	Open_sea	TSS1500	Hypo_in_Resp
cg23117829	chr6	27146353	-	NA	NA	S_Shore	IGR	Hypo_in_Resp
cg04392180	chr7	20600988	-	NA	NA	Open_sea	IGR	Hypo_in_Resp
cg27501190	chr2	160473496	+	LOC643072	Body	S_Shore	5'UTR	Hyper_in_Resp
cg15381304	chr6	110300099	-	GPR6	TSS200	Island	5'UTR	Hyper_in_Resp
cg14874216	chr12	122651623	-	LRRC43	TSS1500	Open_sea	TSS1500	Hypo_in_Resp
cg06421614	chr17	7121116	+	DLG4	Body	N_Shore	TSS1500	Hyper_in_Resp
cg02676406	chr14	51863257	+	RP11-255G12.3	NA	Open_sea	3'UTR	Hypo_in_Resp
cg24351094	chr11	12830110	-	TEAD1	Body	Open_sea	IGR	Hypo_in_Resp
cg23555322	chr4	86850378	+	ARHGAP24	TSS1500	Open_sea	TSS1500	Hypo_in_Resp
cg03610280	chr10	97592418	+	ENTPD1	Body	Open_sea	TSS1500	Hypo_in_Resp
cg04618333	chr17	46800674	+	C17orf93	Body	Island	TSS1500	Hyper_in_Resp
cg01976784	chr11	58869823	-	NA	NA	Island	IGR	Hyper_in_Resp
cg17607298	chr13	112727981	+	NA	NA	Island	IGR	Hypo_in_Resp
cg17787502	chr3	123452994	-	MYLK	Body	Open_sea	3'UTR	Hypo_in_Resp
cg24600895	chr3	173303347	+	NLGN1	5'UTR	Open_sea	5'UTR	Hyper_in_Resp
cg23858410	chr22	46276678	-	WI2-85898F10.1	NA	Island	3'UTR	Hyper_in_Resp
cg05877550	chr16	85369038	-	NA	NA	Open_sea	IGR	Hyper_in_Resp
cg17839758	chr21	46077562	-	C21orf29	Body	Open_sea	TSS1500	Hypo_in_Resp
cg16214670	chr9	137850459	-	NA	NA	Open_sea	IGR	Hyper_in_Resp
cg22211899	chr3	191358304	+	Y_RNA	NA	Open_sea	TSS1500	Hypo_in_Resp
cg14064275	chr7	134967581	+	NA	NA	Open_sea	IGR	Hypo_in_Resp
cg05830760	chr20	20528394	-	RALGAPA2	Body	Open_sea	IGR	Hypo_in_Resp
cg02199826	chr4	74296726	+	AFP	NA	Open_sea	TSS200	Hypo_in_Resp
cg03101021	chr7	126891319	-	GRM8	5'UTR	Island	5'UTR	Hypo_in_Resp
cg08646805	chr7	40338163	+	C7orf10	Body	Open_sea	5'UTR	Hypo_in_Resp
cg01540380	chr11	15837082	+	NA	NA	Open_sea	IGR	Hypo_in_Resp
cg02433564	chr6	37673335	+	NA	NA	Island	IGR	Hyper_in_Resp
cg11408333	chr5	40679514	+	PTGER4	TSS1500	Island	TSS1500	Hypo_in_Resp
cg11955878	chr4	165898967	-	TRIM61	TSS200	Open_sea	TSS200	Hypo_in_Resp
cg19332544	chr4	96050973	+	BMPR1B	Body	Open_sea	IGR	Hypo_in_Resp
cg02034102	chr9	37026739	-	PAX5	Body	Island	5'UTR	Hyper_in_Resp
cg10992219	chr8	53608045	+	RB1CC1	5'UTR	Open_sea	3'UTR	Hypo_in_Resp
cg11183365	chr6	27064769	+	NA	NA	Island	IGR	Hypo_in_Resp
cg06910198	chr10	62332573	+	ANK3	1stExon	Open_sea	1stExon	Hyper_in_Resp
cg06091535	chr6	26331295	+	NA	NA	Open_sea	IGR	Hyper_in_Resp
cg26742280	chr1	236557670	-	EDARADD	TSS1500	N_Shore	TSS1500	Hypo_in_Resp
cg18754857	chr10	100978636	-	HPSE2	Body	Open_sea	IGR	Hypo_in_Resp
cg25008317	chr8	75839311	+	NA	NA	Open_sea	IGR	Hypo_in_Resp
cg24225360	chr4	15471699	-	CC2D2A	5'UTR	Open_sea	1stExon	Hyper_in_Resp
cg14228830	chr3	139257229	+	RBP1	Body	N_Shore	3'UTR	Hypo_in_Resp
cg20022118	chr7	8276021	-	ICA1	5'UTR	Open_sea	5'UTR	Hypo_in_Resp
cg04166439	chr3	167293827	+	WDR49	Body	Open_sea	TSS1500	Hypo_in_Resp
cg17883068	chr15	57277634	-	TCF12	Body	Open_sea	5'UTR	Hypo_in_Resp
cg14655569	chr9	95473718	-	BICD2	3'UTR	N_Shelf	3'UTR	Hyper_in_Resp
cg06246732	chr12	111943674	+	ATXN2	Body	Open_sea	IGR	Hypo_in_Resp
cg20127046	chr14	34833534	+	EGLN3	NA	Open_sea	3'UTR	Hypo_in_Resp
cg06241074	chr15	80690427	-	RP11-210M15.2	NA	Open_sea	TSS200	Hypo_in_Resp
cg14584292	chr11	122063558	-	MIR100HG	Body	Open_sea	3'UTR	Hypo_in_Resp
cg04291970	chr8	11226339	-	C8orf12	Body	Open_sea	5'UTR	Hypo_in_Resp
cg15822222	chr15	79164806	-	MORF4L1	TSS1500	N_Shore	TSS1500	Hyper_in_Resp
cg05394932	chr3	172860467	-	SPATA16	TSS1500	Open_sea	TSS1500	Hypo_in_Resp
cg23122650	chr7	51358671	+	COBL	Body	Open_sea	5'UTR	Hypo_in_Resp
cg11403259	chr2	233325582	+	NA	NA	S_Shore	IGR	Hypo_in_Resp
cg03045699	chr1	107737854	-	NTNG1	Body	Open_sea	5'UTR	Hypo_in_Resp
cg14991984	chr1	99470129	+	LPPR5	1stExon	Island	1stExon	Hyper_in_Resp
cg13167860	chr13	103526085	+	BIVM-ERCC5	Body	Open_sea	TSS1500	Hypo_in_Resp
cg13661397	chr10	5454459	+	NET1	TSS200	Island	TSS1500	Hyper_in_Resp
cg25604516	chr17	14717189	+	NA	NA	Open_sea	IGR	Hyper_in_Resp
cg19728485	chr2	11295717	-	PQLC3	1stExon	Island	1stExon	Hypo_in_Resp
cg10236452	chr1	208132590	+	NA	NA	Island	IGR	Hypo_in_Resp
cg10525327	chr8	89310894	-	MMP16	Body	Open_sea	3'UTR	Hypo_in_Resp
cg25676471	chr22	39633497	-	PDGFB	Body	Open_sea	5'UTR	Hyper_in_Resp
cg22144937	chr9	125462113	-	NA	NA	Open_sea	IGR	Hypo_in_Resp
cg09339818	chr6	100914480	-	NA	NA	N_Shore	IGR	Hypo_in_Resp
cg08154107	chr3	183994073	-	ECE2	Body	Island	TSS1500	Hyper_in_Resp
cg23987286	chr11	74952368	+	TPBGL	1stExon	Island	TSS1500	Hypo_in_Resp
cg05232977	chr10	24745236	-	KIAA1217	5'UTR	Open_sea	5'UTR	Hypo_in_Resp
cg03036910	chr9	111397231	+	NA	NA	Open_sea	IGR	Hypo_in_Resp
cg11376913	chr2	74682103	-	INO80B	TSS200	Island	TSS1500	Hypo_in_Resp
cg01955050	chr5	96217478	+	ERAP2	Body	Open_sea	3'UTR	Hypo_in_Resp
cg19406182	chr22	37721149	+	NA	NA	Island	IGR	Hyper_in_Resp
cg00106565	chr5	146784171	+	DPYSL3	Body	Open_sea	3'UTR	Hypo_in_Resp
cg01423964	chr1	111217575	-	KCNA3	1stExon	Island	5'UTR	Hyper_in_Resp
cg23211059	chr3	168292974	+	EGFEM1P	Body	Open_sea	5'UTR	Hypo_in_Resp
cg04856858	chr2	236402015	+	AGAP1	TSS1500	Island	TSS1500	Hyper_in_Resp
cg12261762	chr18	8730751	+	MTCL1	Body	Open_sea	5'UTR	Hyper_in_Resp
cg25969575	chr6	150576098	+	NA	NA	Open_sea	IGR	Hypo_in_Resp
cg00959259	chr3	122281975	+	PARP9	5'UTR	N_Shore	5'UTR	Hypo_in_Resp
cg08604416	chr10	97278327	+	SORBS1	5'UTR	Open_sea	5'UTR	Hypo_in_Resp
cg05176667	chr14	102029207	-	DIO3	3'UTR	Island	1stExon	Hyper_in_Resp
cg19608286	chr7	20123652	+	LOC101927668	Body	Open_sea	3'UTR	Hypo_in_Resp
cg20803857	chr2	107502615	+	ST6GAL2	TSS200	Island	TSS200	Hypo_in_Resp
cg27339452	chr3	136537752	-	TMEM22	TSS200	Island	1stExon	Hyper_in_Resp
cg19706320	chr14	100204528	-	NA	NA	S_Shore	IGR	Hyper_in_Resp
cg08418079	chr11	11448117	-	GALNT18	Body	Open_sea	IGR	Hypo_in_Resp
cg26460216	chr7	120510371	+	NA	NA	Open_sea	IGR	Hypo_in_Resp
cg03392371	chr6	35116456	-	TCP11	NA	Open_sea	TSS200	Hypo_in_Resp
cg07677273	chr4	37004924	-	RP11-103J17.2	NA	Open_sea	5'UTR	Hypo_in_Resp
cg21913886	chr1	15485346	+	TMEM51	5'UTR	S_Shelf	5'UTR	Hypo_in_Resp
cg26019482	chr4	2845557	-	ADD1	TSS1500	Island	TSS1500	Hypo_in_Resp
cg07409292	chr4	90228685	-	GPRIN3	5'UTR	N_Shore	5'UTR	Hyper_in_Resp
cg10791884	chr8	69879951	+	RP11-600K15.1	NA	Open_sea	3'UTR	Hypo_in_Resp
cg15492180	chr7	37827026	-	GPR141	NA	Open_sea	5'UTR	Hypo_in_Resp
cg07390647	chr3	98453086	+	ST3GAL6	5'UTR	S_Shore	5'UTR	Hyper_in_Resp
cg22232830	chr4	128541611	-	NA	NA	N_Shelf	IGR	Hypo_in_Resp
cg13537590	chr12	26451968	-	RP11-283G6.5	NA	Open_sea	3'UTR	Hypo_in_Resp
cg00890049	chr6	115892863	+	NA	NA	Open_sea	IGR	Hypo_in_Resp
cg08253651	chr12	96252105	-	SNRPF	TSS1500	Island	TSS1500	Hyper_in_Resp
cg22284015	chr1	186834574	-	PLA2G4A	Body	Open_sea	5'UTR	Hypo_in_Resp
cg26045457	chr17	59316817	+	BCAS3	Body	Open_sea	IGR	Hypo_in_Resp
cg00563699	chr1	38397437	+	INPP5B	Body	Island	TSS200	Hypo_in_Resp
cg17653775	chr7	135664852	+	NA	NA	S_Shelf	IGR	Hypo_in_Resp
cg18552861	chr2	20865845	+	GDF7	TSS1500	Island	TSS1500	Hypo_in_Resp
cg12934046	chr6	99283841	+	POU3F2	1stExon	Island	1stExon	Hyper_in_Resp
cg11609154	chr7	139026010	-	C7orf55	5'UTR	Island	5'UTR	Hypo_in_Resp
cg00881585	chr4	41753568	-	RP11-227F19.2	NA	N_Shore	5'UTR	Hypo_in_Resp
cg07926092	chr13	79233506	+	RNF219	TSS200	S_Shore	TSS200	Hypo_in_Resp
cg16289848	chr4	79231477	+	FRAS1	Body	Open_sea	IGR	Hypo_in_Resp
cg09215104	chr12	21507600	-	SLCO1A2	5'UTR	Open_sea	TSS1500	Hypo_in_Resp
cg24462980	chr1	19762766	+	CAPZB	Body	Open_sea	3'UTR	Hypo_in_Resp
cg19452633	chr17	42164476	+	HDAC5	Body	Open_sea	IGR	Hypo_in_Resp
cg27328757	chr2	11295421	-	PQLC3	TSS200	N_Shore	TSS1500	Hyper_in_Resp
cg24478664	chr21	27307027	+	APP	Body	Open_sea	5'UTR	Hypo_in_Resp
cg07268831	chr1	203256204	-	LINC01353	TSS1500	Open_sea	TSS1500	Hyper_in_Resp
cg23525051	chr15	38852680	+	RASGRP1	Body	N_Shelf	5'UTR	Hypo_in_Resp
cg20334243	chr4	156298002	+	MAP9	5'UTR	Island	5'UTR	Hyper_in_Resp
cg00075019	chr1	16563764	-	RSG1	TSS200	Island	TSS1500	Hypo_in_Resp
cg14384532	chr15	88800624	+	NTRK3	TSS1500	Island	TSS1500	Hyper_in_Resp
cg13499717	chr3	157307519	+	C3orf55	Body	Open_sea	IGR	Hypo_in_Resp
cg22649229	chr1	58574499	-	DAB1	5'UTR	Open_sea	5'UTR	Hypo_in_Resp
cg18743793	chr7	50464661	-	IKZF1	Body	N_Shelf	5'UTR	Hypo_in_Resp
cg18359250	chr10	96405263	-	NA	NA	Open_sea	IGR	Hypo_in_Resp
cg22234941	chr7	114571546	+	MDFIC	Body	Open_sea	IGR	Hypo_in_Resp
cg19570321	chr11	63258214	+	HRASLS5	Body	N_Shore	TSS1500	Hyper_in_Resp
cg05758010	chr5	81046942	+	SSBP2	1stExon	Island	TSS1500	Hypo_in_Resp
cg19529823	chr2	10442953	+	HPCAL1	TSS1500	Island	TSS1500	Hyper_in_Resp
cg01183358	chr3	15811128	-	ANKRD28	5'UTR	Open_sea	3'UTR	Hypo_in_Resp
cg17091020	chr8	91986716	+	NA	NA	Open_sea	IGR	Hypo_in_Resp
cg00762613	chr13	36045224	+	NBEA	Body	Island	TSS1500	Hyper_in_Resp
cg24779584	chr15	83956581	-	RP11-382A20.4	NA	S_Shelf	5'UTR	Hypo_in_Resp
cg01357585	chr12	12766615	+	CREBL2	Body	S_Shore	5'UTR	Hypo_in_Resp
cg01343363	chr16	58533808	-	NDRG4	Body	N_Shore	TSS1500	Hyper_in_Resp
cg23537887	chr3	54157647	+	CACNA2D3	Body	S_Shore	5'UTR	Hypo_in_Resp
cg07483244	chr13	95358924	-	NA	NA	N_Shore	IGR	Hyper_in_Resp
cg24630782	chr8	125640145	-	MTSS1	Body	Open_sea	3'UTR	Hypo_in_Resp
cg12989574	chr13	93879544	-	GPC6	1stExon	Island	5'UTR	Hyper_in_Resp
cg26828058	chr6	130544162	+	SAMD3	TSS200	Open_sea	TSS200	Hypo_in_Resp
cg11235594	chr2	110907413	-	NPHP1	Body	Open_sea	3'UTR	Hypo_in_Resp
cg22636916	chr7	35840710	-	SEPT7-AS1	TSS1500	Island	TSS1500	Hypo_in_Resp
cg06362895	chr17	78578898	+	RPTOR	Body	Open_sea	5'UTR	Hyper_in_Resp
cg10614045	chr11	20182122	-	DBX1	TSS1500	Island	1stExon	Hyper_in_Resp
cg00337662	chr15	68113328	+	NA	NA	Island	IGR	Hyper_in_Resp
cg01203205	chr7	27502432	+	NA	NA	Open_sea	IGR	Hypo_in_Resp
cg12938425	chr14	104605300	-	KIF26A	Body	Island	TSS1500	Hypo_in_Resp
cg11758945	chr8	143533532	+	BAI1	NA	Island	5'UTR	Hypo_in_Resp
cg21425037	chr1	9826324	+	CLSTN1	Body	S_Shelf	IGR	Hypo_in_Resp
cg13288394	chr4	105827067	-	RP11-556I14.1	NA	Open_sea	TSS1500	Hypo_in_Resp
cg11959821	chr7	45151241	+	TBRG4	1stExon	Island	3'UTR	Hypo_in_Resp
cg18391127	chr15	89462418	+	NA	NA	Open_sea	IGR	Hypo_in_Resp
cg20733879	chr8	118146034	+	SLC30A8	TSS1500	Open_sea	TSS1500	Hypo_in_Resp
cg00369658	chr11	57365088	-	SERPING1	1stExon	Open_sea	TSS1500	Hyper_in_Resp
cg04267686	chr6	105907265	+	NA	NA	Open_sea	IGR	Hypo_in_Resp
cg17193369	chr10	119135132	+	PDZD8	TSS200	Island	TSS1500	Hypo_in_Resp
cg13858974	chr9	86149293	-	FRMD3	Body	N_Shelf	5'UTR	Hypo_in_Resp
cg08954948	chr10	6100768	-	IL2RA	Body	Open_sea	3'UTR	Hypo_in_Resp
cg01019301	chr15	62910795	-	TLN2	NA	Open_sea	5'UTR	Hypo_in_Resp
cg24032888	chr9	14316266	+	NFIB	Body	S_Shore	TSS1500	Hyper_in_Resp
cg01802258	chr14	92790097	+	SLC24A4	TSS200	Island	5'UTR	Hyper_in_Resp
cg02942008	chr20	55842375	-	BMP7	TSS1500	S_Shore	TSS1500	Hyper_in_Resp
cg11820600	chr1	243752707	+	AKT3	Body	Open_sea	IGR	Hypo_in_Resp
cg27588356	chr6	161459571	-	MAP3K4	Body	Open_sea	5'UTR	Hypo_in_Resp
cg22114991	chr7	68162874	+	NA	NA	Open_sea	IGR	Hypo_in_Resp
cg11804248	chr15	49447897	+	GALK2	TSS200	S_Shore	TSS200	Hypo_in_Resp
cg10206312	chr2	111820220	+	ACOXL	Body	Open_sea	3'UTR	Hypo_in_Resp
cg17531025	chr16	29002219	-	RP11-264B17.5	NA	Open_sea	TSS200	Hypo_in_Resp
cg01109729	chr2	43953	-	FAM110C	Body	N_Shore	3'UTR	Hypo_in_Resp
cg21223481	chr2	171700398	+	GAD1	Body	Open_sea	1stExon	Hypo_in_Resp
cg09528496	chr19	3881225	+	ATCAY	5'UTR	Island	5'UTR	Hyper_in_Resp
cg13454226	chr10	3823758	-	KLF6	Body	N_Shore	3'UTR	Hypo_in_Resp
cg16635352	chr11	20620914	+	SLC6A5	TSS200	N_Shore	TSS1500	Hyper_in_Resp
cg08835992	chr11	7870404	-	OR5E1P	TSS200	Open_sea	3'UTR	Hypo_in_Resp
cg14201707	chr1	27852061	+	RP1-159A19.4	NA	N_Shelf	TSS1500	Hyper_in_Resp
cg11617821	chr4	75672135	+	BTC	3'UTR	Open_sea	3'UTR	Hypo_in_Resp
cg14087413	chr9	35848330	-	TMEM8B	Body	S_Shore	IGR	Hypo_in_Resp
cg01392253	chr14	67708096	-	MPP5	1stExon	Island	TSS1500	Hyper_in_Resp
cg03772617	chr1	30856557	-	NA	NA	Open_sea	IGR	Hyper_in_Resp
cg22963629	chr7	31147341	+	ADCYAP1R1	NA	Open_sea	3'UTR	Hypo_in_Resp
cg13720163	chr9	5352782	+	NA	NA	Open_sea	IGR	Hypo_in_Resp
cg15564949	chr2	166937973	-	LOC101929680	TSS200	Open_sea	TSS200	Hypo_in_Resp
cg18630030	chr17	60900969	-	MIR548W	Body	Open_sea	IGR	Hypo_in_Resp
cg17883458	chr3	137489767	+	RP11-2A4.3	NA	Island	TSS1500	Hypo_in_Resp
cg17826834	chr15	96868857	-	NR2F2	TSS1500	S_Shelf	TSS1500	Hyper_in_Resp
cg22378678	chr3	167185752	+	SERPINI2	Body	Open_sea	IGR	Hypo_in_Resp
cg08542725	chr8	75010420	-	RP11-6I2.3	NA	Open_sea	5'UTR	Hypo_in_Resp
cg26703001	chr15	55834750	+	PYGO1	3'UTR	Open_sea	3'UTR	Hypo_in_Resp
cg26552650	chr6	113682475	+	RP11-437J19.1	NA	Open_sea	3'UTR	Hypo_in_Resp
cg09728869	chr15	85951572	-	AKAP13	5'UTR	Open_sea	5'UTR	Hypo_in_Resp
cg24441922	chr2	235401950	+	ARL4C	3'UTR	N_Shelf	3'UTR	Hypo_in_Resp
cg21613620	chr13	97927242	+	MBNL2	5'UTR	Open_sea	TSS1500	Hypo_in_Resp
cg09114151	chr11	85956200	-	EED	5'UTR	Island	5'UTR	Hyper_in_Resp
cg18075721	chr1	116324197	-	NA	NA	Open_sea	IGR	Hypo_in_Resp
cg12846139	chr17	79372242	-	BAHCC1	TSS1500	Island	5'UTR	Hyper_in_Resp
cg03546739	chr7	6713037	+	AC073343.13	NA	Open_sea	5'UTR	Hypo_in_Resp
cg25948180	chr11	34936781	-	PDHX	TSS1500	N_Shore	TSS1500	Hyper_in_Resp
cg16538328	chr17	1092288	-	ABR	NA	Open_sea	5'UTR	Hyper_in_Resp
cg13334579	chr21	40011860	+	ERG	5'UTR	Open_sea	5'UTR	Hypo_in_Resp
cg22202786	chr5	76383494	+	LOC728723	Body	S_Shore	TSS1500	Hyper_in_Resp
cg18005901	chr6	33739558	+	LEMD2	3'UTR	Island	3'UTR	Hypo_in_Resp
cg08357990	chr2	33359550	-	LTBP1	TSS200	Open_sea	TSS200	Hyper_in_Resp
cg02091275	chr1	167469123	+	CD247	Body	Open_sea	3'UTR	Hypo_in_Resp
cg22058855	chr6	27064968	-	NA	NA	Island	IGR	Hypo_in_Resp
cg01698328	chr10	4850477	-	AKR1E2	NA	Open_sea	5'UTR	Hypo_in_Resp
cg02652768	chr6	31697688	+	DDAH2	5'UTR	Island	3'UTR	Hypo_in_Resp
cg13019149	chr7	16684504	-	BZW2	TSS1500	Island	TSS1500	Hypo_in_Resp
cg27161809	chr10	90889872	+	NA	NA	Open_sea	IGR	Hypo_in_Resp
cg13240017	chr1	230777744	-	COG2	TSS1500	N_Shore	TSS1500	Hyper_in_Resp
cg02384888	chr7	23748715	+	STK31	TSS1500	Open_sea	TSS1500	Hypo_in_Resp
cg26540441	chr2	236120905	-	NA	NA	Open_sea	IGR	Hypo_in_Resp
cg16578537	chr3	194408556	-	FAM43A	1stExon	Island	1stExon	Hyper_in_Resp
cg26118326	chr1	150547677	+	MCL1	3'UTR	N_Shelf	3'UTR	Hypo_in_Resp
cg24939283	chr3	185785561	+	ETV5	Body	Open_sea	3'UTR	Hypo_in_Resp
cg10612251	chr6	137960552	+	NA	NA	Open_sea	IGR	Hypo_in_Resp
cg07538187	chr13	45285150	+	NA	NA	Open_sea	IGR	Hypo_in_Resp
cg25510569	chr3	171506308	-	PLD1	5'UTR	Open_sea	5'UTR	Hypo_in_Resp
cg12104395	chr12	48099712	+	RPAP3	5'UTR	Island	5'UTR	Hypo_in_Resp
cg04048172	chr7	46816228	-	NA	NA	Open_sea	IGR	Hyper_in_Resp
cg08903528	chr8	37350191	-	LINC01605	Body	Open_sea	5'UTR	Hypo_in_Resp
cg11212437	chr1	193091225	-	CDC73	5'UTR	S_Shore	TSS1500	Hypo_in_Resp
cg18142906	chr3	167293814	+	WDR49	Body	Open_sea	TSS1500	Hypo_in_Resp
cg21300390	chr6	28220434	-	ZKSCAN4	5'UTR	S_Shore	5'UTR	Hyper_in_Resp
cg09799983	chr2	38301756	-	CYP1B1	Body	Island	3'UTR	Hyper_in_Resp
cg00119896	chr7	3083721	+	CARD11	TSS200	Open_sea	TSS200	Hyper_in_Resp
cg17292885	chr9	139780977	-	MIR4479	TSS1500	Island	1stExon	Hypo_in_Resp
cg08874788	chr8	98656259	+	MTDH	TSS200	Island	TSS1500	Hypo_in_Resp
cg03739132	chr5	171601028	+	STK10	Body	Open_sea	IGR	Hypo_in_Resp
cg04966942	chr7	93517456	+	TFPI2	Body	N_Shore	5'UTR	Hypo_in_Resp
cg08355045	chr6	80787529	-	NA	NA	Open_sea	IGR	Hypo_in_Resp
cg10202746	chr6	99005125	-	RP3-453D15.1	NA	Open_sea	TSS1500	Hypo_in_Resp
cg17633592	chr13	112758599	-	NA	NA	Island	IGR	Hyper_in_Resp
cg00797434	chr11	32680447	+	CCDC73	Body	Open_sea	3'UTR	Hypo_in_Resp
cg06436382	chr7	156839594	-	NA	NA	Open_sea	IGR	Hypo_in_Resp
cg05786836	chr7	12588838	+	NA	NA	Open_sea	IGR	Hypo_in_Resp
cg27164797	chr6	57038231	+	BAG2	Body	S_Shore	TSS1500	Hyper_in_Resp
cg27174438	chr10	119304708	-	EMX2	Body	Island	1stExon	Hypo_in_Resp
cg20917552	chr21	26945251	-	MIR155	TSS1500	Open_sea	TSS1500	Hypo_in_Resp
cg26064460	chr1	23703928	-	NA	NA	Open_sea	IGR	Hypo_in_Resp
cg14316431	chr9	96721817	-	NA	NA	Island	IGR	Hyper_in_Resp
cg13905899	chr1	231275535	+	NA	NA	Open_sea	IGR	Hypo_in_Resp
cg00366685	chr3	121796397	+	CD86	TSS1500	Open_sea	TSS1500	Hyper_in_Resp
cg24002887	chr7	64407743	+	NA	NA	Island	IGR	Hyper_in_Resp
cg09675166	chr3	171071278	+	TNIK	Body	Open_sea	IGR	Hypo_in_Resp
cg11021995	chr7	37488577	-	ELMO1	TSS200	Island	1stExon	Hyper_in_Resp
cg18887429	chr17	29641165	+	EVI2B	TSS200	Open_sea	TSS200	Hypo_in_Resp
cg12713604	chr5	68339208	-	CTC-498J12.1	NA	Open_sea	3'UTR	Hyper_in_Resp
cg03241244	chr12	122017052	+	KDM2B	Body	Island	3'UTR	Hyper_in_Resp
cg01752041	chr8	63055444	-	NA	NA	N_Shore	IGR	Hypo_in_Resp
cg02118671	chr8	143660412	-	NA	NA	Open_sea	IGR	Hyper_in_Resp
cg07362060	chr2	11915711	+	LPIN1	Body	Open_sea	IGR	Hypo_in_Resp
cg25438961	chr14	54307520	+	AL162759.1	NA	Open_sea	3'UTR	Hypo_in_Resp
cg26664155	chr5	110635928	+	CAMK4	Body	Open_sea	5'UTR	Hypo_in_Resp
cg09869156	chr8	6405472	-	ANGPT2	Body	Open_sea	5'UTR	Hypo_in_Resp
cg06602594	chr15	85259794	-	SEC11A	TSS200	Island	1stExon	Hypo_in_Resp
cg17196591	chr11	94829192	-	ENDOD1	Body	Open_sea	IGR	Hypo_in_Resp
cg08220332	chr9	91726021	+	SHC3	Body	Open_sea	TSS1500	Hypo_in_Resp
cg12077433	chr3	159600838	+	SCHIP1	Body	Open_sea	5'UTR	Hypo_in_Resp
cg17147917	chr8	119809044	+	NA	NA	Open_sea	IGR	Hypo_in_Resp
cg11062785	chr14	52243422	+	RP11-280K24.4	NA	Open_sea	5'UTR	Hyper_in_Resp
cg16274532	chr14	31291944	+	RP11-159L20.2	NA	Open_sea	TSS200	Hypo_in_Resp
cg19067700	chr3	192131180	-	FGF12	Body	S_Shelf	5'UTR	Hypo_in_Resp
cg15060330	chr12	9822229	-	CLEC2D	TSS200	Open_sea	TSS200	Hypo_in_Resp
cg25620430	chr15	53093405	-	NA	NA	N_Shelf	IGR	Hyper_in_Resp
cg02493167	chr5	76935719	-	OTP	TSS1500	N_Shore	TSS1500	Hypo_in_Resp
cg10078900	chr16	10849177	-	NUBP1	Body	Open_sea	5'UTR	Hypo_in_Resp
cg17266282	chr6	112294532	-	NA	NA	Open_sea	IGR	Hypo_in_Resp
cg02366798	chr7	27237154	+	HOXA13	3'UTR	N_Shore	3'UTR	Hypo_in_Resp
cg09700683	chr13	37247950	+	SERTM1	TSS200	Island	TSS200	Hyper_in_Resp
cg15568027	chr12	76084805	-	RP11-114H23.1	NA	Open_sea	3'UTR	Hypo_in_Resp
cg03820867	chr3	18782758	-	AC105750.1	NA	Open_sea	5'UTR	Hypo_in_Resp
cg15715892	chr10	105846129	-	COL17A1	TSS1500	Open_sea	TSS1500	Hypo_in_Resp
cg15841062	chr2	24925976	-	NCOA1	Body	Open_sea	IGR	Hypo_in_Resp
cg18561589	chr10	119295770	+	EMX2OS	Body	Island	3'UTR	Hypo_in_Resp
cg19823847	chr6	138539706	+	KIAA1244	Body	Open_sea	TSS200	Hypo_in_Resp
cg18374944	chr2	10794586	-	NOL10	ExonBnd	Open_sea	ExonBnd	Hypo_in_Resp
cg04818040	chr1	113086792	-	ST7L	Body	Open_sea	3'UTR	Hypo_in_Resp
cg04328562	chr19	11649701	+	CNN1	1stExon	Open_sea	5'UTR	Hyper_in_Resp
cg19734045	chr3	137852643	+	A4GNT	TSS1500	Open_sea	TSS1500	Hypo_in_Resp
cg00340855	chr6	30458586	+	HLA-E	Body	S_Shore	5'UTR	Hypo_in_Resp
cg10230427	chr6	57038227	+	BAG2	Body	S_Shore	TSS1500	Hyper_in_Resp
cg11169075	chr8	61819391	-	NA	NA	N_Shelf	IGR	Hypo_in_Resp
cg26089877	chr17	4498445	+	SMTNL2	Body	Island	1stExon	Hyper_in_Resp
cg15545700	chr12	9268985	+	A2M	TSS1500	Open_sea	TSS1500	Hypo_in_Resp
cg10250426	chr6	158182413	+	NA	NA	Open_sea	IGR	Hypo_in_Resp
cg13724788	chr19	19322778	-	NCAN	TSS200	Island	TSS200	Hyper_in_Resp
cg02497700	chr1	244213358	-	ZNF238	TSS1500	N_Shore	TSS1500	Hyper_in_Resp
cg13291688	chr4	139753296	-	RP11-371F15.3	NA	Open_sea	3'UTR	Hypo_in_Resp
cg01618633	chr4	130782425	+	RNY5P4	NA	Open_sea	TSS1500	Hypo_in_Resp
cg22668995	chr3	168558640	+	NA	NA	Open_sea	IGR	Hypo_in_Resp
cg15666143	chr3	130061073	+	NA	NA	N_Shelf	IGR	Hypo_in_Resp
cg08233112	chr12	123574762	+	PITPNM2	5'UTR	Open_sea	3'UTR	Hypo_in_Resp
cg06562836	chr5	152871618	-	GRIA1	5'UTR	Open_sea	5'UTR	Hyper_in_Resp
cg27071397	chr8	99478938	+	STK3	Body	Open_sea	3'UTR	Hypo_in_Resp
cg11388488	chr10	126377575	+	FAM53B	Body	Open_sea	3'UTR	Hypo_in_Resp
cg27531842	chr2	131672685	+	NA	NA	N_Shore	IGR	Hypo_in_Resp
cg21683106	chr18	121074	+	ROCK1P1	Body	Open_sea	IGR	Hypo_in_Resp
cg01881742	chr3	75985057	-	ROBO2	NA	Open_sea	5'UTR	Hypo_in_Resp
cg20848291	chr7	100343083	-	ZAN	Body	Open_sea	5'UTR	Hypo_in_Resp
cg14196263	chr13	110443740	-	NA	NA	S_Shelf	IGR	Hyper_in_Resp
cg18862767	chr1	40137970	-	NT5C1A	TSS1500	Island	TSS1500	Hyper_in_Resp
cg13068626	chr6	99732003	-	FAXC	Body	Open_sea	1stExon	Hypo_in_Resp
cg02701388	chr21	17798271	-	MIR99AHG	Body	Open_sea	5'UTR	Hypo_in_Resp
cg09676651	chr3	167589948	+	RP11-298O21.3	NA	Open_sea	TSS1500	Hypo_in_Resp
cg12422515	chr7	38340955	+	TRGV10	NA	Open_sea	TSS1500	Hypo_in_Resp
cg23381749	chr12	130645423	+	RP11-143E21.7	NA	Island	3'UTR	Hyper_in_Resp
cg16923485	chr12	21476904	+	SLCO1A2	Body	Open_sea	3'UTR	Hypo_in_Resp
cg11104828	chr11	58869979	+	NA	NA	Island	IGR	Hyper_in_Resp
cg08357285	chr12	107147780	+	RFX4	Body	Open_sea	IGR	Hypo_in_Resp
cg08471588	chr3	195591056	+	TNK2	Body	N_Shelf	3'UTR	Hypo_in_Resp
cg03654504	chr1	37495105	+	GRIK3	Body	N_Shelf	IGR	Hypo_in_Resp
cg13292470	chr13	112718952	+	NA	NA	N_Shore	IGR	Hyper_in_Resp
cg17107364	chr8	65491906	+	BHLHE22	TSS1500	N_Shore	3'UTR	Hyper_in_Resp
cg09251771	chr6	10695336	-	C6orf52	TSS1500	Island	TSS1500	Hypo_in_Resp
cg22405816	chr9	118135937	-	2001-12-01	5'UTR	Open_sea	5'UTR	Hypo_in_Resp
cg08915361	chr13	23002664	+	NA	NA	Open_sea	IGR	Hypo_in_Resp
cg14291650	chr15	65325589	+	NA	NA	S_Shelf	IGR	Hyper_in_Resp
cg17422176	chr10	73497772	+	C10orf105	TSS200	Open_sea	TSS200	Hypo_in_Resp
cg09652503	chr12	127210744	-	RP11-173C20.1	NA	N_Shore	TSS1500	Hyper_in_Resp
cg05709578	chr8	77591132	-	LOC100192378	Body	S_Shore	3'UTR	Hyper_in_Resp
cg20302533	chr7	39170763	-	POU6F2	Body	Open_sea	5'UTR	Hypo_in_Resp
cg05211864	chr17	39969239	+	P3H4	TSS1500	S_Shore	TSS1500	Hyper_in_Resp
cg06199761	chr2	202099846	-	CASP8	5'UTR	Open_sea	5'UTR	Hypo_in_Resp
cg12602633	chr6	32119691	-	PRRT1	1stExon	S_Shore	3'UTR	Hyper_in_Resp
cg17268882	chr3	184430218	+	MAGEF1	TSS1500	S_Shore	TSS1500	Hyper_in_Resp
cg27554953	chr6	108062292	+	SCML4	Body	Open_sea	3'UTR	Hypo_in_Resp
cg02973930	chr1	98854360	+	NA	NA	Open_sea	IGR	Hypo_in_Resp
cg13152690	chr14	91695017	+	NA	NA	Open_sea	IGR	Hypo_in_Resp
cg12252430	chr20	61317532	-	NA	NA	S_Shelf	IGR	Hyper_in_Resp
cg06232585	chr5	110294022	-	NA	NA	Open_sea	IGR	Hypo_in_Resp
cg23840338	chr12	102078642	+	MYBPC1	3'UTR	Open_sea	3'UTR	Hypo_in_Resp
cg17232014	chr12	13153193	-	HEBP1	1stExon	S_Shore	1stExon	Hyper_in_Resp
cg16073383	chr3	147710651	+	RP11-71N10.1	NA	Open_sea	5'UTR	Hypo_in_Resp
cg07130714	chr3	168335941	-	C3orf50	Body	Open_sea	5'UTR	Hypo_in_Resp
cg20168849	chr3	188995030	-	TPRG1	Body	Open_sea	5'UTR	Hypo_in_Resp
cg20285548	chr21	44803308	-	NA	NA	Open_sea	IGR	Hyper_in_Resp
cg20979815	chr11	94296907	+	PIWIL4	NA	Open_sea	5'UTR	Hypo_in_Resp
cg02179982	chr22	46365647	+	WNT7B	Body	N_Shore	5'UTR	Hypo_in_Resp
cg20427538	chr17	72281069	-	DNAI2	Body	Open_sea	5'UTR	Hyper_in_Resp
cg22085625	chr1	16091218	-	FBLIM1	TSS1500	Open_sea	TSS1500	Hypo_in_Resp
cg20195957	chr2	68694673	-	APLF	TSS200	Island	TSS200	Hypo_in_Resp
cg24768989	chr6	124602882	+	NKAIN2	TSS1500	Open_sea	TSS1500	Hypo_in_Resp
cg10334285	chr9	107890405	+	NA	NA	Open_sea	IGR	Hypo_in_Resp
cg14456851	chr3	190235442	-	IL1RAP	5'UTR	S_Shelf	5'UTR	Hypo_in_Resp
cg09208059	chr10	118373849	-	NA	NA	Open_sea	IGR	Hypo_in_Resp
cg12753119	chr3	18996624	-	U6	NA	Open_sea	TSS200	Hypo_in_Resp
cg12172069	chr8	118400476	+	NA	NA	Open_sea	IGR	Hypo_in_Resp
cg22097729	chr7	105565521	-	CDHR3	NA	Open_sea	5'UTR	Hypo_in_Resp
cg14593352	chr18	21418923	+	LAMA3	Body	Open_sea	IGR	Hypo_in_Resp
cg10129408	chr6	10421001	-	TFAP2A	TSS1500	N_Shore	TSS1500	Hyper_in_Resp
cg11145160	chr3	170136278	-	CLDN11	TSS1500	Island	TSS1500	Hyper_in_Resp
cg25769450	chr22	23864945	-	NA	NA	S_Shore	IGR	Hyper_in_Resp
cg24824287	chr3	44726891	-	RP11-944L7.4	NA	N_Shore	3'UTR	Hypo_in_Resp
cg13230606	chr17	36105337	-	HNF1B	TSS1500	Island	1stExon	Hypo_in_Resp
cg23673093	chr8	38053398	-	BAG4	Body	Open_sea	5'UTR	Hypo_in_Resp
cg05057827	chr14	98670848	-	RP11-61O1.1	NA	Open_sea	3'UTR	Hyper_in_Resp
cg07964833	chr19	55392883	-	FCAR	Body	Open_sea	5'UTR	Hyper_in_Resp
cg26070648	chr3	176554124	-	RP11-644C3.1	NA	Open_sea	3'UTR	Hypo_in_Resp
cg24093474	chr16	58533787	-	NDRG4	TSS1500	N_Shore	TSS1500	Hyper_in_Resp
cg03158666	chr17	7199744	-	NA	NA	Island	IGR	Hypo_in_Resp
cg25478717	chr4	74347571	+	AFM	1stExon	Open_sea	1stExon	Hypo_in_Resp
cg11636414	chr5	87969386	+	LINC00461	TSS1500	S_Shore	TSS1500	Hyper_in_Resp
cg07460502	chr1	178581690	+	NA	NA	Open_sea	IGR	Hypo_in_Resp
cg21296632	chr5	90355362	+	ADGRV1	Body	Open_sea	3'UTR	Hypo_in_Resp
cg04056025	chr13	45694609	-	GTF2F2	TSS200	Island	TSS200	Hypo_in_Resp
cg24975834	chr13	112720171	+	NA	NA	N_Shore	IGR	Hyper_in_Resp
cg03223159	chr4	146028480	+	ABCE1	Body	Open_sea	TSS1500	Hypo_in_Resp
cg21242613	chr1	15670546	-	FHAD1	Body	Open_sea	TSS1500	Hyper_in_Resp
cg23012886	chr10	127383747	-	LOC283038	Body	Open_sea	5'UTR	Hyper_in_Resp
cg07625513	chr15	89577786	+	NA	NA	Open_sea	IGR	Hyper_in_Resp
cg20008885	chr1	193670163	+	RP11-21J7.1	NA	Open_sea	5'UTR	Hypo_in_Resp
cg18719814	chr4	47916640	+	NFXL1	TSS200	Island	1stExon	Hypo_in_Resp
cg18551822	chr6	2110875	+	GMDS	Body	Open_sea	IGR	Hypo_in_Resp
cg11387026	chr2	220455869	+	7SK	NA	Open_sea	TSS200	Hypo_in_Resp
cg26571793	chr21	31853031	-	KRTAP19-1	TSS1500	Open_sea	TSS1500	Hypo_in_Resp
cg26560981	chr4	87039369	-	MAPK10	Body	Open_sea	TSS1500	Hypo_in_Resp
cg17841267	chr10	112117449	+	NA	NA	Open_sea	IGR	Hypo_in_Resp
cg18288337	chr5	140561031	-	PCDHB16	TSS1500	S_Shore	5'UTR	Hypo_in_Resp
cg10632837	chr10	135334559	-	CYP2E1	NA	S_Shore	5'UTR	Hypo_in_Resp
cg07572770	chr1	146713916	+	CHD1L	TSS1500	N_Shore	TSS1500	Hyper_in_Resp
cg12352284	chr8	97744293	+	CPQ	5'UTR	Open_sea	TSS1500	Hypo_in_Resp
cg10535675	chr11	85955574	+	EED	TSS1500	Island	TSS1500	Hypo_in_Resp
cg15478670	chr7	80512604	+	SEMA3C	Body	Open_sea	3'UTR	Hypo_in_Resp
cg08200399	chr1	40563105	+	PPT1	1stExon	Island	1stExon	Hypo_in_Resp
cg23855989	chr12	50355821	+	AQP5	1stExon	Island	3'UTR	Hyper_in_Resp
cg07121856	chr7	95025736	+	PON3	TSS200	Island	TSS1500	Hypo_in_Resp
cg08014404	chr11	68145165	-	LRP5	5'UTR	Open_sea	IGR	Hypo_in_Resp
cg24544134	chr17	37783422	-	PPP1R1B	5'UTR	Island	5'UTR	Hyper_in_Resp
cg10647101	chr22	19744026	-	TBX1	TSS200	Island	TSS200	Hyper_in_Resp
cg19556948	chr4	83934056	+	LIN54	TSS200	Island	1stExon	Hypo_in_Resp
cg22659094	chr12	119882496	-	CCDC60	Body	Open_sea	5'UTR	Hyper_in_Resp
cg05432558	chr17	62632136	-	SMURF2	Body	Open_sea	IGR	Hypo_in_Resp
cg10821341	chr5	138430671	-	SIL1	Body	Open_sea	TSS1500	Hypo_in_Resp
cg09367815	chr21	30463648	-	MAP3K7CL	TSS1500	Open_sea	TSS1500	Hypo_in_Resp
cg04924453	chr1	172987127	+	RP1-15D23.2	NA	Open_sea	5'UTR	Hyper_in_Resp
cg14640756	chr3	154116693	-	GPR149	Body	Open_sea	IGR	Hypo_in_Resp
cg00755219	chr22	27620801	-	RP5-1172A22.1	NA	Open_sea	TSS200	Hyper_in_Resp
cg06838985	chr11	101453871	-	TRPC6	Body	Island	TSS1500	Hyper_in_Resp
cg06369187	chr14	50506033	+	LINC01599	Body	Open_sea	3'UTR	Hypo_in_Resp
cg10008950	chr1	153358924	+	NA	NA	Open_sea	IGR	Hypo_in_Resp
cg15082014	chr3	99973047	-	NA	NA	Open_sea	IGR	Hyper_in_Resp
cg09721427	chr10	94448702	-	HHEX	TSS1500	Island	5'UTR	Hypo_in_Resp
cg00070162	chr1	91852791	-	HFM1	Body	Open_sea	5'UTR	Hypo_in_Resp
cg00335360	chr12	2793097	+	CACNA1C-AS1	Body	Open_sea	3'UTR	Hyper_in_Resp
cg19581221	chr5	14593942	-	FAM105A	Body	Open_sea	IGR	Hypo_in_Resp
cg02852025	chr7	50348174	+	IKZF1	5'UTR	S_Shelf	TSS200	Hypo_in_Resp
cg03533073	chr14	22568689	-	NA	NA	Open_sea	IGR	Hyper_in_Resp
cg06751243	chr20	1927911	-	RP4-684O24.5	NA	Island	1stExon	Hyper_in_Resp
cg03495498	chr14	97878346	-	NA	NA	Open_sea	IGR	Hyper_in_Resp
cg13568348	chr2	54952346	-	EML6	1stExon	Island	5'UTR	Hyper_in_Resp
cg25905348	chr1	40733757	-	ZMPSTE24	Body	Open_sea	IGR	Hypo_in_Resp
cg18026227	chr8	77593471	+	LOC100192378	Body	N_Shore	TSS1500	Hypo_in_Resp
cg13055301	chr5	168974734	+	NA	NA	Open_sea	IGR	Hyper_in_Resp
cg03781663	chr11	62255221	-	AHNAK	Body	Open_sea	3'UTR	Hyper_in_Resp
cg03733760	chr11	69517841	-	FGF19	Body	Island	IGR	Hyper_in_Resp
cg20671649	chr1	3309864	-	PRDM16	Body	N_Shore	IGR	Hyper_in_Resp
cg19457823	chr5	142692961	-	NR3C1	Body	Open_sea	3'UTR	Hypo_in_Resp
cg00186224	chr10	21369318	+	NEBL	Body	Open_sea	IGR	Hypo_in_Resp
cg12281328	chr5	149681703	-	ARSI	1stExon	Island	1stExon	Hypo_in_Resp
cg08553437	chr4	122686456	+	TMEM155	TSS200	Island	TSS1500	Hyper_in_Resp
cg20215116	chr2	46551063	-	EPAS1	Body	Open_sea	5'UTR	Hypo_in_Resp
cg13741406	chr19	47207882	-	PRKD2	Body	S_Shore	IGR	Hypo_in_Resp
cg02742906	chr13	112758625	-	NA	NA	Island	IGR	Hyper_in_Resp
cg07454933	chr4	82273176	+	NA	NA	Open_sea	IGR	Hyper_in_Resp
cg07714622	chr1	201743131	-	RNU6-79P	Body	Open_sea	5'UTR	Hypo_in_Resp
cg09935160	chr20	21745411	+	NA	NA	Open_sea	IGR	Hypo_in_Resp
cg04654299	chr17	2308689	+	NA	NA	S_Shelf	IGR	Hypo_in_Resp
cg13046207	chr3	168192865	+	EGFEM1P	Body	Open_sea	TSS200	Hypo_in_Resp
cg23786916	chr5	102764516	-	NA	NA	Open_sea	IGR	Hypo_in_Resp
cg26749572	chr5	145227551	-	NA	NA	Open_sea	IGR	Hypo_in_Resp
cg14034197	chr18	18823107	-	GREB1L	5'UTR	Island	5'UTR	Hyper_in_Resp
cg02134397	chr18	61442792	-	SERPINB7	1stExon	Open_sea	1stExon	Hypo_in_Resp
cg19790640	chr8	104153829	+	BAALC	Body	S_Shore	TSS200	Hyper_in_Resp
cg13533707	chr11	73309287	+	FAM168A	TSS200	Island	TSS200	Hypo_in_Resp
cg22230229	chr17	79372254	-	BAHCC1	TSS1500	Island	5'UTR	Hyper_in_Resp
cg00706903	chr1	216755247	-	ESRRG	Body	Open_sea	IGR	Hypo_in_Resp
cg22164707	chr4	155427586	-	NA	NA	Open_sea	IGR	Hyper_in_Resp
cg11191350	chr4	140098536	+	ELF2	NA	Island	TSS200	Hypo_in_Resp
cg01461034	chr1	168623133	+	NA	NA	Open_sea	IGR	Hypo_in_Resp
cg12745332	chr6	14639068	-	NA	NA	Open_sea	IGR	Hyper_in_Resp
cg12714140	chr16	8347712	-	RP11-279O17.1	NA	Open_sea	TSS1500	Hypo_in_Resp
cg07256817	chr7	872480	-	SUN1	Body	Open_sea	5'UTR	Hypo_in_Resp
cg19391006	chr3	172856620	-	SPATA16	5'UTR	Open_sea	5'UTR	Hypo_in_Resp
cg27621721	chr3	189901160	+	NA	NA	Open_sea	IGR	Hypo_in_Resp
cg04621676	chr1	9599380	+	SLC25A33	TSS200	Island	TSS200	Hypo_in_Resp
cg01330096	chr13	112713372	-	NA	NA	N_Shore	IGR	Hyper_in_Resp
cg13823293	chr3	143568660	-	SLC9A9	TSS1500	Open_sea	TSS1500	Hypo_in_Resp
cg05802452	chr1	228194476	+	WNT3A	TSS1500	Island	TSS1500	Hypo_in_Resp
cg23838838	chr12	89740403	+	NA	NA	Open_sea	IGR	Hypo_in_Resp
cg10486655	chr16	68624584	-	RP11-615I2.1	NA	Open_sea	TSS1500	Hypo_in_Resp
cg00925616	chr1	32410211	+	PTP4A2	NA	Island	1stExon	Hyper_in_Resp
cg19559621	chr11	66035671	-	RAB1B	TSS1500	N_Shore	TSS1500	Hypo_in_Resp
cg18888655	chr19	17403176	-	ABHD8	3'UTR	Island	3'UTR	Hyper_in_Resp
cg22149419	chr17	27253138	-	PHF12	Body	Open_sea	3'UTR	Hypo_in_Resp
cg05256304	chr11	116969870	-	SIK3	TSS1500	S_Shore	TSS1500	Hyper_in_Resp
cg12329720	chr18	13611409	+	LDLRAD4	TSS1500	Open_sea	TSS1500	Hyper_in_Resp
cg00643086	chr6	26332252	+	NA	NA	Open_sea	IGR	Hyper_in_Resp
cg16271141	chr22	41106006	+	NA	NA	Open_sea	IGR	Hyper_in_Resp
cg13534071	chr2	28632319	+	FOSL2	Body	Open_sea	IGR	Hypo_in_Resp
cg06083932	chr19	585281	-	NA	NA	Island	IGR	Hyper_in_Resp
cg22829164	chr10	101156363	-	NA	NA	Open_sea	IGR	Hypo_in_Resp
cg24662228	chr8	77591191	-	ZFHX4-AS1	Body	S_Shore	3'UTR	Hyper_in_Resp
cg24465573	chr13	86159885	+	RNU6-72	NA	Open_sea	TSS1500	Hypo_in_Resp
cg21308365	chr6	119031399	+	CEP85L	NA	Open_sea	TSS200	Hypo_in_Resp
cg26932554	chr20	19797789	+	NA	NA	Open_sea	IGR	Hypo_in_Resp
cg23909013	chr21	39288941	+	KCNJ6	TSS1500	Island	TSS200	Hyper_in_Resp
cg19844704	chr10	119304705	-	EMX2	Body	Island	1stExon	Hypo_in_Resp
cg23919882	chr2	206566436	+	NRP2	Body	Open_sea	IGR	Hypo_in_Resp
cg20931902	chr1	29591726	-	PTPRU	Body	Open_sea	5'UTR	Hypo_in_Resp
cg24145109	chr1	5806951	-	NA	NA	Open_sea	IGR	Hyper_in_Resp
cg21022547	chr9	80091194	-	GNA14	Body	Open_sea	5'UTR	Hypo_in_Resp
cg24375409	chr1	38200920	+	EPHA10	Body	Island	ExonBnd	Hyper_in_Resp
cg03168615	chr1	68664666	-	GNG12-AS1	Body	Open_sea	5'UTR	Hypo_in_Resp
cg01907761	chr5	147647809	+	SPINK5L3	TSS1500	Open_sea	TSS1500	Hypo_in_Resp
cg20939114	chr17	65471507	-	PITPNC1	Body	Open_sea	IGR	Hyper_in_Resp
cg26563211	chr10	65313266	+	REEP3	Body	Open_sea	5'UTR	Hypo_in_Resp
cg16991589	chr13	25670047	-	PABPC3	TSS1500	Island	TSS1500	Hypo_in_Resp
cg04921708	chr3	197241511	+	BDH1	Body	Open_sea	3'UTR	Hypo_in_Resp
cg27111463	chr2	88751405	+	FOXI3	Body	Island	IGR	Hyper_in_Resp
cg20823859	chr1	111971624	-	OVGP1	TSS1500	Open_sea	TSS1500	Hyper_in_Resp
cg24568579	chr12	111841024	+	RP3-473L9.4	NA	N_Shore	5'UTR	Hyper_in_Resp
cg12570922	chr20	5204134	+	NA	NA	Open_sea	IGR	Hyper_in_Resp
cg00364758	chr7	37964310	-	EPDR1	Body	S_Shelf	5'UTR	Hypo_in_Resp
cg15938050	chr17	68984117	+	NA	NA	Open_sea	IGR	Hyper_in_Resp
cg22272282	chr6	27107670	-	HIST1H2BK	3'UTR	S_Shore	3'UTR	Hypo_in_Resp
cg17095014	chr3	69134104	+	ARL6IP5	5'UTR	Island	TSS200	Hypo_in_Resp
cg11883561	chr6	112158734	+	FYN	5'UTR	Open_sea	5'UTR	Hypo_in_Resp
cg11444704	chr5	159738916	+	CCNJL	Body	Island	3'UTR	Hypo_in_Resp
cg03071582	chr6	164392967	-	NA	NA	N_Shore	IGR	Hyper_in_Resp
cg06867065	chr19	51871233	+	CLDND2	Body	Island	IGR	Hypo_in_Resp
cg27661103	chr13	81856528	-	RP11-452B18.2	NA	Open_sea	TSS1500	Hypo_in_Resp
cg19694010	chr12	130645520	-	RP11-143E21.7	NA	Island	3'UTR	Hyper_in_Resp
cg04983142	chr10	118032355	-	GFRA1	5'UTR	Island	5'UTR	Hyper_in_Resp
cg10779924	chr3	167243469	-	WDR49	Body	Open_sea	3'UTR	Hypo_in_Resp
cg14608422	chr10	75634225	-	CAMK2G	5'UTR	Island	1stExon	Hypo_in_Resp
cg24540763	chr12	122377170	-	WDR66	Body	Open_sea	5'UTR	Hypo_in_Resp
cg18524739	chr2	105471348	+	POU3F3	TSS1500	Island	TSS1500	Hyper_in_Resp
cg01530213	chr7	122840559	+	SLC13A1	TSS1500	Open_sea	TSS1500	Hypo_in_Resp
cg01491219	chr1	220863513	-	C1orf115	TSS200	Island	5'UTR	Hyper_in_Resp
cg03430067	chr19	14016927	+	C19orf57	TSS200	Island	TSS200	Hypo_in_Resp
cg24662139	chr22	35615029	-	LINC01399	Body	Open_sea	3'UTR	Hypo_in_Resp
cg04616652	chr1	186147654	+	HMCN1	Body	Open_sea	TSS1500	Hypo_in_Resp
cg03505186	chr3	134179960	+	NA	NA	Open_sea	IGR	Hypo_in_Resp
cg02181405	chr9	111435766	-	NA	NA	Open_sea	IGR	Hypo_in_Resp
cg05765906	chr7	8157396	+	ICA1	Body	Open_sea	3'UTR	Hypo_in_Resp
cg24985459	chr3	37035090	-	MLH1	TSS200	Island	TSS1500	Hypo_in_Resp
cg09951572	chr21	31767469	+	KRTAP13-1	TSS1500	Open_sea	TSS1500	Hypo_in_Resp
cg26706520	chr17	15655637	+	NA	NA	S_Shelf	IGR	Hypo_in_Resp
cg11862731	chr3	194408516	-	FAM43A	1stExon	Island	1stExon	Hyper_in_Resp
cg20335953	chr18	51749158	-	SNORA37	TSS1500	N_Shore	TSS1500	Hypo_in_Resp
cg09626054	chr7	35320315	-	NA	NA	Open_sea	IGR	Hypo_in_Resp
cg20207299	chr15	80881481	+	ARNT2	Body	Open_sea	3'UTR	Hypo_in_Resp
cg01450725	chr4	154714852	+	NA	NA	S_Shore	IGR	Hypo_in_Resp
cg11210312	chr7	86475480	-	GRM3	Body	Open_sea	IGR	Hypo_in_Resp
cg07583651	chr11	61560366	-	FEN1	5'UTR	Island	1stExon	Hypo_in_Resp
cg16062053	chr3	168269152	+	MIR551B	TSS1500	Open_sea	TSS1500	Hypo_in_Resp
cg16428136	chr8	104862644	-	RIMS2	Body	Open_sea	TSS1500	Hypo_in_Resp
cg23803709	chr10	54203646	+	NA	NA	Open_sea	IGR	Hypo_in_Resp
cg12611801	chr4	60697873	+	Y_RNA	NA	Open_sea	TSS1500	Hypo_in_Resp
cg07894663	chr16	4338268	-	NA	NA	Open_sea	IGR	Hyper_in_Resp
cg14832023	chr17	41857055	-	C17orf105	TSS1500	S_Shore	TSS1500	Hyper_in_Resp
cg03174122	chr6	52742077	+	NA	NA	Open_sea	IGR	Hypo_in_Resp
cg16705627	chr13	112721950	+	SOX1	1stExon	Island	5'UTR	Hypo_in_Resp
cg23604699	chr3	110826313	+	PVRL3	Body	Open_sea	5'UTR	Hypo_in_Resp
cg12735966	chr7	145396445	+	NA	NA	Open_sea	IGR	Hypo_in_Resp
cg07193024	chr10	25201378	-	PRTFDC1	Body	Open_sea	IGR	Hypo_in_Resp
cg00259588	chr9	101559271	+	ANKS6	TSS1500	S_Shore	TSS1500	Hyper_in_Resp
cg11326036	chr6	36341704	+	ETV7	Body	Open_sea	5'UTR	Hyper_in_Resp
cg06412669	chr17	78735550	-	RPTOR	Body	Open_sea	3'UTR	Hypo_in_Resp
cg15713103	chr1	933685	+	NA	NA	Island	IGR	Hyper_in_Resp
cg10146199	chr4	157998201	+	GLRB	5'UTR	S_Shore	5'UTR	Hyper_in_Resp
cg05900563	chr17	46681550	-	HOXB-AS3	Body	N_Shelf	5'UTR	Hypo_in_Resp
cg26826331	chr4	114677214	-	CAMK2D	Body	Open_sea	3'UTR	Hypo_in_Resp
cg27489640	chr10	127751966	+	ADAM12	Body	Open_sea	3'UTR	Hypo_in_Resp
cg03500164	chr17	58160046	-	NA	NA	S_Shelf	IGR	Hypo_in_Resp
cg23706615	chr19	1287884	+	EFNA2	Body	Island	5'UTR	Hyper_in_Resp
cg13556934	chr1	179553141	+	NA	NA	N_Shelf	IGR	Hypo_in_Resp
cg00359846	chr7	118101103	+	AC006926.1	NA	Open_sea	TSS1500	Hypo_in_Resp
cg19210770	chr2	220379091	-	ACCN4	1stExon	S_Shore	1stExon	Hyper_in_Resp
cg10626169	chr7	48319696	-	ABCA13	Body	Open_sea	IGR	Hypo_in_Resp
cg24643286	chr9	126769990	+	LHX2	NA	N_Shore	5'UTR	Hyper_in_Resp
cg10876417	chr19	16882352	+	NWD1	Body	Open_sea	3'UTR	Hyper_in_Resp
cg16634253	chr6	148343187	-	RP11-242F11.2	NA	Open_sea	TSS1500	Hypo_in_Resp
cg20687262	chr10	7201610	+	SFMBT2	3'UTR	Open_sea	3'UTR	Hypo_in_Resp
cg19421218	chr3	114012659	-	TIGIT	TSS200	Open_sea	5'UTR	Hypo_in_Resp
cg26877270	chr5	44385931	-	FGF10	Body	Open_sea	IGR	Hypo_in_Resp
cg21626848	chr17	39969267	+	SC65	TSS1500	S_Shore	TSS1500	Hyper_in_Resp
cg23331957	chr9	109159029	-	RP11-308N19.1	NA	Open_sea	5'UTR	Hypo_in_Resp
cg26168400	chr2	202316215	+	STRADB	TSS200	Island	TSS1500	Hypo_in_Resp
cg00689580	chr6	10420798	+	TFAP2A	TSS1500	N_Shore	TSS1500	Hyper_in_Resp
cg05756933	chr6	110300101	-	GPR6	TSS200	Island	5'UTR	Hyper_in_Resp
cg08584628	chr5	178286875	+	ZNF354B	TSS200	Island	TSS1500	Hypo_in_Resp
cg24590853	chr12	100831771	-	NA	NA	Open_sea	IGR	Hypo_in_Resp
cg26654161	chr10	94448805	+	HHEX	TSS1500	Island	5'UTR	Hypo_in_Resp
cg09938692	chr4	137203268	+	RP11-775H9.2	NA	Open_sea	TSS1500	Hypo_in_Resp
cg23892535	chr14	104643224	+	KIF26A	Body	Island	IGR	Hyper_in_Resp
cg13459171	chr13	48986750	-	LPAR6	1stExon	Open_sea	TSS200	Hypo_in_Resp
cg27245573	chr8	63386950	+	NKAIN3	Body	Open_sea	TSS200	Hypo_in_Resp
cg12033124	chr12	118745504	-	TAOK3	5'UTR	Open_sea	5'UTR	Hypo_in_Resp
cg06034082	chr3	140949912	-	PXYLP1	TSS1500	Island	TSS1500	Hyper_in_Resp
cg19838163	chr3	169411535	-	NA	NA	Open_sea	IGR	Hypo_in_Resp
cg12466566	chr6	26576734	-	NA	NA	Open_sea	IGR	Hyper_in_Resp
cg03477789	chr1	118381646	+	NA	NA	Open_sea	IGR	Hypo_in_Resp
cg23451228	chr8	129527284	-	LINC00824	Body	Open_sea	3'UTR	Hypo_in_Resp
cg01818076	chr16	86532758	+	NA	NA	Island	IGR	Hyper_in_Resp
cg16520348	chr1	11199787	-	MTOR	Body	Open_sea	3'UTR	Hypo_in_Resp
cg12928379	chr11	637175	-	DRD4	TSS200	Island	TSS200	Hypo_in_Resp
cg07369850	chr3	172693052	+	SPATA16	Body	Open_sea	TSS200	Hypo_in_Resp
cg22788657	chr6	26332446	+	NA	NA	Open_sea	IGR	Hyper_in_Resp
cg01355030	chr5	32531689	+	SUB1	NA	Open_sea	TSS1500	Hypo_in_Resp
cg24891709	chr7	138794209	+	ZC3HAV1	1stExon	Island	1stExon	Hyper_in_Resp
cg03735496	chr18	18822637	+	GREB1L	5'UTR	Island	5'UTR	Hyper_in_Resp
cg12340687	chr17	57408255	-	YPEL2	TSS1500	N_Shore	TSS1500	Hyper_in_Resp
cg19383445	chr3	107661189	-	NA	NA	Open_sea	IGR	Hypo_in_Resp
cg03839554	chr3	179280332	+	ACTL6A	TSS1500	N_Shore	TSS1500	Hypo_in_Resp
cg17319891	chr1	38226240	-	EPHA10	3'UTR	N_Shore	3'UTR	Hypo_in_Resp
cg06778755	chr15	79383151	-	RASGRF1	1stExon	Island	TSS200	Hyper_in_Resp
cg07152355	chr7	51303122	-	COBL	Body	Open_sea	5'UTR	Hypo_in_Resp
cg12891197	chr22	38902464	-	DDX17	TSS200	Island	TSS1500	Hypo_in_Resp
cg12973994	chr10	85995194	-	LRIT1	Body	N_Shore	IGR	Hypo_in_Resp
cg15851462	chr4	144538111	+	FREM3	Body	Open_sea	5'UTR	Hypo_in_Resp
cg08302365	chr9	135037896	-	NTNG2	5'UTR	Island	5'UTR	Hyper_in_Resp
cg15286249	chr5	52639175	+	NA	NA	Open_sea	IGR	Hypo_in_Resp
cg14632793	chr2	75374207	+	TACR1	Body	Open_sea	IGR	Hyper_in_Resp
cg07915546	chr1	171189343	+	RP1-45C12.1	NA	Open_sea	3'UTR	Hypo_in_Resp
cg08062338	chr3	181428669	+	SOX2OT	Body	N_Shore	TSS1500	Hyper_in_Resp
cg16604827	chr7	46585768	-	NA	NA	Open_sea	IGR	Hypo_in_Resp
cg10664971	chr10	81915574	+	ANXA11	3'UTR	Open_sea	3'UTR	Hypo_in_Resp
cg07430214	chr3	172166300	-	GHSR	TSS200	Island	TSS200	Hyper_in_Resp
cg11789302	chr10	50948007	+	OGDHL	Body	Open_sea	TSS1500	Hypo_in_Resp
cg09093656	chr17	16323481	+	TRPV2	Body	Open_sea	5'UTR	Hypo_in_Resp
cg04737150	chr2	161077747	-	ITGB6	NA	Open_sea	3'UTR	Hypo_in_Resp
cg09785550	chr1	33890365	+	PHC2	NA	Open_sea	3'UTR	Hypo_in_Resp
cg22842860	chr11	113348189	+	NA	NA	S_Shore	IGR	Hyper_in_Resp
cg11446736	chr13	89404403	-	NA	NA	Open_sea	IGR	Hypo_in_Resp
cg13089479	chr3	29965042	-	RBMS3	Body	Open_sea	TSS1500	Hypo_in_Resp
cg11080570	chr17	60198491	+	Y_RNA	NA	Open_sea	TSS1500	Hypo_in_Resp
cg04464316	chr13	35322453	-	NA	NA	Open_sea	IGR	Hypo_in_Resp
cg17920058	chr5	133460362	+	TCF7	Body	Open_sea	5'UTR	Hypo_in_Resp
cg09309261	chr12	113906999	-	LHX5	Body	N_Shore	IGR	Hyper_in_Resp
cg24626312	chr17	46671332	-	LOC404266	Body	Island	5'UTR	Hypo_in_Resp
cg11028755	chr1	116832065	-	NA	NA	Open_sea	IGR	Hypo_in_Resp
cg07197230	chr22	17956641	+	CECR2	1stExon	Open_sea	ExonBnd	Hyper_in_Resp
cg17474601	chr5	9654151	+	LOC285692	Body	Open_sea	3'UTR	Hypo_in_Resp
cg16566164	chr4	153894523	-	FHDC1	Body	N_Shelf	IGR	Hypo_in_Resp
cg13979529	chr5	58423667	-	PDE4D	Body	Open_sea	3'UTR	Hyper_in_Resp
cg18797653	chr5	135416613	+	MIR886	TSS1500	S_Shore	TSS1500	Hypo_in_Resp
cg14795609	chr1	107359771	+	RP11-233E12.1-001	NA	Open_sea	TSS1500	Hypo_in_Resp
cg21901300	chr19	47928050	+	NA	NA	S_Shelf	IGR	Hyper_in_Resp
cg18921600	chr13	22736100	-	NA	NA	Open_sea	IGR	Hypo_in_Resp
cg06566477	chr20	61078502	+	NA	NA	Open_sea	IGR	Hyper_in_Resp
cg03762572	chr1	7692325	-	CAMTA1	Body	Open_sea	IGR	Hyper_in_Resp
cg05600352	chr17	33913923	-	AP2B1	TSS1500	Open_sea	TSS1500	Hyper_in_Resp
cg06206902	chr7	27191226	+	HOXA-AS3	NA	S_Shore	5'UTR	Hypo_in_Resp
cg21230793	chr8	93920498	-	C8orf83	Body	Open_sea	5'UTR	Hypo_in_Resp
cg13856833	chr3	156506013	+	LINC00886	Body	Open_sea	3'UTR	Hypo_in_Resp
cg22256607	chr8	41648357	-	ANK1	Body	Open_sea	3'UTR	Hyper_in_Resp
cg24207698	chr2	166811308	+	TTC21B	TSS1500	S_Shore	TSS1500	Hyper_in_Resp
cg19240869	chr21	40140783	+	LINC00114	Body	Open_sea	3'UTR	Hypo_in_Resp
cg04887675	chr13	110956761	+	COL4A1	Body	N_Shelf	TSS1500	Hypo_in_Resp
cg12226293	chr12	4333816	-	NA	NA	Open_sea	IGR	Hyper_in_Resp
cg18793036	chr3	154798648	-	MME	5'UTR	S_Shore	5'UTR	Hypo_in_Resp
cg19661311	chr3	193938999	-	LOC100505920	Body	Open_sea	3'UTR	Hypo_in_Resp
cg08070022	chr3	101497478	+	FAM55C	TSS1500	N_Shore	TSS1500	Hyper_in_Resp
cg14965722	chr2	230579469	-	DNER	TSS200	Island	TSS200	Hypo_in_Resp
cg09221413	chr17	39969252	+	P3H4	TSS1500	S_Shore	TSS1500	Hyper_in_Resp
cg26426690	chr10	93861824	-	CPEB3	Body	Open_sea	IGR	Hypo_in_Resp
cg25278025	chr2	103378026	+	TMEM182	TSS1500	Open_sea	TSS1500	Hypo_in_Resp
cg01972418	chr14	37125430	-	PAX9	TSS1500	Island	3'UTR	Hypo_in_Resp
cg05868019	chr9	107330414	+	OR13C8	TSS1500	Open_sea	TSS1500	Hypo_in_Resp
cg20856378	chr1	40525169	-	CAP1	Body	Open_sea	IGR	Hypo_in_Resp
cg09489306	chr19	44203913	+	NA	NA	Island	IGR	Hyper_in_Resp
cg13714407	chr9	134604212	+	RAPGEF1	Body	Open_sea	5'UTR	Hypo_in_Resp
cg12300018	chr8	63903574	+	NKAIN3	3'UTR	Open_sea	3'UTR	Hypo_in_Resp
cg24495327	chr13	21276713	-	IL17D	TSS1500	N_Shore	TSS1500	Hyper_in_Resp
cg21212084	chr3	50661812	-	MAPKAPK3	Body	Open_sea	IGR	Hypo_in_Resp
cg09204067	chr3	140800565	-	SPSB4	Body	Open_sea	5'UTR	Hypo_in_Resp
cg07109796	chr19	11379596	-	NA	NA	Open_sea	IGR	Hypo_in_Resp
cg08017268	chr17	28500882	+	NSRP1	Body	Open_sea	5'UTR	Hypo_in_Resp
cg10606620	chr4	177824114	+	NA	NA	Open_sea	IGR	Hypo_in_Resp
cg22463866	chr3	169976442	-	PRKCI	Body	Open_sea	IGR	Hypo_in_Resp
cg08265451	chr8	74184299	+	AC008598.1	NA	Open_sea	TSS1500	Hypo_in_Resp
cg08430325	chr6	100442489	+	MCHR2	TSS1500	S_Shore	TSS1500	Hypo_in_Resp
cg07658637	chr2	199236982	-	LOC101927619	Body	Open_sea	3'UTR	Hypo_in_Resp
cg07070077	chr3	114271393	-	ZBTB20	Body	Open_sea	3'UTR	Hypo_in_Resp
cg26990102	chr2	119606746	-	EN1	TSS1500	Island	TSS1500	Hyper_in_Resp
cg20386243	chr17	53239706	+	STXBP4	3'UTR	Open_sea	3'UTR	Hypo_in_Resp
cg17339147	chr7	116963500	+	WNT2	TSS200	Island	TSS1500	Hyper_in_Resp
cg14848003	chr12	111375439	-	RP1-46F2.2	NA	Open_sea	5'UTR	Hyper_in_Resp
cg07459489	chr8	118147163	+	SLC30A8	TSS200	Open_sea	TSS1500	Hypo_in_Resp
cg02487020	chr15	41836440	+	RPAP1	1stExon	Island	3'UTR	Hyper_in_Resp
cg14494721	chr12	58013636	-	SLC26A10	TSS200	Island	TSS1500	Hyper_in_Resp
cg13572892	chr9	124980041	+	LHX6	Body	N_Shore	5'UTR	Hyper_in_Resp
cg17948798	chr11	65292462	+	SCYL1	TSS200	N_Shore	TSS1500	Hypo_in_Resp
cg05359579	chr2	43695484	+	THADA	Body	Open_sea	3'UTR	Hypo_in_Resp
cg01215762	chr7	27214126	-	HOXA10	TSS200	Island	TSS1500	Hyper_in_Resp
cg02779944	chr1	200004584	+	NR5A2	Body	Island	3'UTR	Hyper_in_Resp
cg13958749	chr15	89010551	+	MRPS11	TSS200	Island	3'UTR	Hypo_in_Resp
cg10992704	chr1	162795932	+	C1orf110	NA	S_Shelf	3'UTR	Hypo_in_Resp
cg14578895	chr9	118906252	+	NA	NA	Open_sea	IGR	Hypo_in_Resp
cg00991994	chr3	99639553	+	C3orf26	Body	Open_sea	5'UTR	Hypo_in_Resp
cg01212570	chr3	196245508	+	NA	NA	Open_sea	IGR	Hypo_in_Resp
cg16478718	chr1	205255989	+	NA	NA	Open_sea	IGR	Hypo_in_Resp
cg25695232	chr2	202397506	+	ALS2CR11	Body	Open_sea	IGR	Hypo_in_Resp
cg07089091	chr7	26222905	-	NFE2L3	Body	Open_sea	TSS1500	Hypo_in_Resp
cg19515360	chr3	156086146	-	KCNAB1	Body	Open_sea	5'UTR	Hypo_in_Resp
cg07413330	chr8	121107225	+	COL14A1	NA	Open_sea	5'UTR	Hypo_in_Resp
cg04202310	chr7	25054731	+	NA	NA	Open_sea	IGR	Hypo_in_Resp
cg04050867	chr8	109095572	-	RSPO2	1stExon	Island	TSS1500	Hyper_in_Resp
cg16158816	chr5	152870276	+	GRIA1	TSS1500	Open_sea	TSS1500	Hyper_in_Resp
cg16761327	chr4	166893140	-	TLL1	Body	Open_sea	5'UTR	Hypo_in_Resp
cg26723524	chr7	39775803	-	LOC349114	Body	S_Shelf	5'UTR	Hypo_in_Resp
cg16220592	chr1	151821308	+	THEM5	Body	Open_sea	5'UTR	Hyper_in_Resp
cg13237207	chr13	98192250	+	NA	NA	Open_sea	IGR	Hypo_in_Resp
cg22792560	chr4	152446017	+	FAM160A1	5'UTR	Open_sea	5'UTR	Hypo_in_Resp
cg14290210	chr4	41162942	+	APBB2	5'UTR	Open_sea	5'UTR	Hypo_in_Resp
cg24401711	chr9	71532723	+	PIP5K1B	Body	Open_sea	IGR	Hypo_in_Resp
cg27003520	chr1	165086976	-	NA	NA	Island	IGR	Hyper_in_Resp
cg22500027	chr14	22935574	-	AE000661.37	NA	Open_sea	3'UTR	Hypo_in_Resp
cg14798255	chr8	82451771	-	NA	NA	Open_sea	IGR	Hypo_in_Resp
cg26379859	chr11	58672888	+	GLYATL2	NA	Island	TSS1500	Hypo_in_Resp
cg23704675	chr2	219347615	-	USP37	Body	Open_sea	3'UTR	Hypo_in_Resp
cg24061122	chr5	137672901	-	FAM53C	TSS1500	N_Shore	5'UTR	Hyper_in_Resp
cg08721974	chr11	47575259	+	CELF1	TSS1500	S_Shore	TSS1500	Hyper_in_Resp
cg17911773	chr2	45516349	+	AC009236.1	NA	Open_sea	3'UTR	Hypo_in_Resp
cg04932082	chr6	91113506	+	NA	NA	Open_sea	IGR	Hyper_in_Resp
cg08158976	chr1	228297975	+	MRPL55	TSS1500	S_Shore	TSS1500	Hyper_in_Resp
cg11438287	chr13	110970196	+	COL4A2	Body	S_Shelf	5'UTR	Hyper_in_Resp
cg21383810	chr12	65515470	-	WIF1	TSS1500	Island	TSS1500	Hyper_in_Resp
cg05687083	chr7	5371160	+	TNRC18	Body	N_Shore	IGR	Hypo_in_Resp
cg01693519	chr3	181446790	-	SOX2-OT	Body	S_Shore	5'UTR	Hyper_in_Resp
cg12519296	chr17	47755478	+	SPOP	1stExon	Island	1stExon	Hyper_in_Resp
cg05567468	chr7	116338775	+	MET	5'UTR	Open_sea	TSS1500	Hypo_in_Resp
cg21743307	chr3	54159139	+	CACNA2D3	Body	S_Shelf	5'UTR	Hypo_in_Resp
cg17949057	chr2	158297335	-	CYTIP	Body	Open_sea	3'UTR	Hypo_in_Resp
cg19138376	chr2	149360870	-	NA	NA	Open_sea	IGR	Hypo_in_Resp
cg01015123	chr3	161214690	+	OTOL1	1stExon	Open_sea	1stExon	Hypo_in_Resp
cg16328106	chr2	61372138	-	C2orf74	TSS200	Open_sea	TSS200	Hypo_in_Resp
cg07862320	chr16	57024770	-	NLRC5	NA	S_Shore	5'UTR	Hypo_in_Resp

## Sheet: Table_S4
Supplementary Table S4. Over-represented KEGG pathways
Gene Set	Description	Size	Expect	Ratio	P Value	FDR
hsa04360	Axon guidance	175	5.1747	2.8987	0.00019635	0.026634
hsa04390	Hippo signaling pathway	154	4.5537	3.0744	0.00017325	0.026634
hsa04510	Focal adhesion	199	5.8843	2.7191	0.00025251	0.026634
hsa05200	Pathways in cancer	524	15.494	1.9362	0.0003268	0.026634
hsa04010	MAPK signaling pathway	295	8.723	2.2928	0.00043096	0.028098
hsa04072	Phospholipase D signaling pathway	146	4.3172	2.7796	0.0012381	0.05677
hsa05224	Breast cancer	147	4.3467	2.7607	0.0013137	0.05677
hsa05226	Gastric cancer	148	4.3763	2.742	0.0013931	0.05677
hsa04150	mTOR signaling pathway	151	4.465	2.6876	0.0016555	0.059967

## Sheet: Table_S5
Supplementary Table S5. Genes and molecular pathways affected by methylation differences between responders and non-responders to ICI
Gene Symbol	Gene Name	Entrez Gene ID	Methylation change
Axon guidance
BMP7	bone morphogenetic protein 7	655	Hyper_in_Resp
BMPR1B	bone morphogenetic protein receptor type 1B	658	Hypo_in_Resp
CAMK2D	calcium/calmodulin dependent protein kinase II delta	817	Hypo_in_Resp
CAMK2G	calcium/calmodulin dependent protein kinase II gamma	818	Hypo_in_Resp
EFNA2	ephrin A2	1943	Hyper_in_Resp
EPHA6	EPH receptor A6	285220	Hypo_in_Resp
FYN	FYN proto-oncogene, Src family tyrosine kinase	2534	Hypo_in_Resp
GDF7	growth differentiation factor 7	151449	Hypo_in_Resp
MET	MET proto-oncogene, receptor tyrosine kinase	4233	Hypo_in_Resp
NTNG1	netrin G1	22854	Hypo_in_Resp
NTNG2	netrin G2	84628	Hyper_in_Resp
ROBO2	roundabout guidance receptor 2	6092	Hypo_in_Resp
SEMA3C	semaphorin 3C	10512	Hypo_in_Resp
TRPC6	transient receptor potential cation channel subfamily C member 6	7225	Hyper_in_Resp
UNC5A	unc-5 netrin receptor A	90249	Hyper_in_Resp
Hippo signaling
AFP	alpha fetoprotein	174	Hypo_in_Resp
BMP7	bone morphogenetic protein 7	655	Hyper_in_Resp
BMPR1B	bone morphogenetic protein receptor type 1B	658	Hypo_in_Resp
DLG4	discs large MAGUK scaffold protein 4	1742	Hyper_in_Resp
GDF7	growth differentiation factor 7	151449	Hypo_in_Resp
GLI2	GLI family zinc finger 2	2736	Hypo_in_Resp
MPP5	membrane palmitoylated protein 5	64398	Hyper_in_Resp
PRKCI	protein kinase C iota	5584	Hypo_in_Resp
STK3	serine/threonine kinase 3	6788	Hypo_in_Resp
TCF7	transcription factor 7	6932	Hypo_in_Resp
TEAD1	TEA domain transcription factor 1	7003	Hypo_in_Resp
WNT2	Wnt family member 2	7472	Hyper_in_Resp
WNT3A	Wnt family member 3A	89780	Hypo_in_Resp
WNT7B	Wnt family member 7B	7477	Hypo_in_Resp
Pathways in cancer
AKT3	AKT serine/threonine kinase 3	10000	Hypo_in_Resp
ARNT2	aryl hydrocarbon receptor nuclear translocator 2	9915	Hypo_in_Resp
CAMK2D	calcium/calmodulin dependent protein kinase II delta	817	Hypo_in_Resp
CAMK2G	calcium/calmodulin dependent protein kinase II gamma	818	Hypo_in_Resp
CASP8	caspase 8	841	Hypo_in_Resp
COL4A1	collagen type IV alpha 1 chain	1282	Hypo_in_Resp
COL4A2	collagen type IV alpha 2 chain	1284	Hyper_in_Resp
EGLN3	egl-9 family hypoxia inducible factor 3	112399	Hypo_in_Resp
EPAS1	endothelial PAS domain protein 1	2034	Hypo_in_Resp
FGF10	fibroblast growth factor 10	2255	Hypo_in_Resp
FGF19	fibroblast growth factor 19	9965	Hyper_in_Resp
GLI2	GLI family zinc finger 2	2736	Hypo_in_Resp
IGF1R	insulin like growth factor 1 receptor	3480	Hypo_in_Resp
IL2RA	interleukin 2 receptor subunit alpha	3559	Hypo_in_Resp
LAMA3	laminin subunit alpha 3	3909	Hypo_in_Resp
LPAR6	lysophosphatidic acid receptor 6	10161	Hypo_in_Resp
LRP5	LDL receptor related protein 5	4041	Hypo_in_Resp
MAPK10	mitogen-activated protein kinase 10	5602	Hypo_in_Resp
MET	MET proto-oncogene, receptor tyrosine kinase	4233	Hypo_in_Resp
MLH1	mutL homolog 1	4292	Hypo_in_Resp
MTOR	mechanistic target of rapamycin kinase	2475	Hypo_in_Resp
NCOA1	nuclear receptor coactivator 1	8648	Hypo_in_Resp
PDGFB	platelet derived growth factor subunit B	5155	Hyper_in_Resp
PLD1	phospholipase D1	5337	Hypo_in_Resp
PTGER4	prostaglandin E receptor 4	5734	Hypo_in_Resp
RASGRP1	RAS guanyl releasing protein 1	10125	Hypo_in_Resp
TCF7	transcription factor 7	6932	Hypo_in_Resp
WNT2	Wnt family member 2	7472	Hyper_in_Resp
WNT3A	Wnt family member 3A	89780	Hypo_in_Resp
WNT7B	Wnt family member 7B	7477	Hypo_in_Resp
MAPK signaling
AKT3	AKT serine/threonine kinase 3	10000	Hypo_in_Resp
ANGPT2	angiopoietin 2	285	Hypo_in_Resp
CACNA2D3	calcium voltage-gated channel auxiliary subunit alpha2delta 3	55799	Hypo_in_Resp
EFNA2	ephrin A2	1943	Hyper_in_Resp
FGF10	fibroblast growth factor 10	2255	Hypo_in_Resp
FGF19	fibroblast growth factor 19	9965	Hyper_in_Resp
IGF1R	insulin like growth factor 1 receptor	3480	Hypo_in_Resp
IL1RAP	interleukin 1 receptor accessory protein	3556	Hypo_in_Resp
MAP3K1	mitogen-activated protein kinase kinase kinase 1	4214	Hypo_in_Resp
MAP3K4	mitogen-activated protein kinase kinase kinase 4	4216	Hypo_in_Resp
MAPK10	mitogen-activated protein kinase 10	5602	Hypo_in_Resp
MAPKAPK3	mitogen-activated protein kinase-activated protein kinase 3	7867	Hypo_in_Resp
MET	MET proto-oncogene, receptor tyrosine kinase	4233	Hypo_in_Resp
PDGFB	platelet derived growth factor subunit B	5155	Hyper_in_Resp
PLA2G4A	phospholipase A2 group IVA	5321	Hypo_in_Resp
PTPN5	protein tyrosine phosphatase, non-receptor type 5	84867	Hyper_in_Resp
RASGRF1	Ras protein specific guanine nucleotide releasing factor 1	5923	Hyper_in_Resp
RASGRP1	RAS guanyl releasing protein 1	10125	Hypo_in_Resp
STK3	serine/threonine kinase 3	6788	Hypo_in_Resp
TAOK3	TAO kinase 3	51347	Hypo_in_Resp

## Sheet: Table_S6
Supplementary Table S6. Over-represented Gene Ontologies (biological process)
Gene Set	Description	Size	Expect	Ratio	P Value	FDR
GO:0007389	pattern specification process	433	13.452	2.8249	7.9736e-09	6.7776e-06
GO:0030900	forebrain development	375	11.65	2.9185	2.2585e-08	9.5986e-06
GO:0021510	spinal cord development	104	3.2309	4.9522	1.2487e-07	3.5378e-05
GO:0002009	morphogenesis of an epithelium	480	14.912	2.4812	3.519e-07	7.4779e-05
GO:0061564	axon development	490	15.223	2.2335	1.0657e-05	0.0015483
GO:0021915	neural tube development	161	5.0017	3.3989	1.0929e-05	0.0015483
GO:2000027	regulation of animal organ morphogenesis	207	6.4307	2.9546	2.524e-05	0.0030648
GO:0031098	stress-activated protein kinase signaling cascade	305	9.4752	2.5329	2.9992e-05	0.0031866
GO:0045165	cell fate commitment	249	7.7355	2.7147	3.4246e-05	0.0032344
GO:0021953	central nervous system neuron differentiation	179	5.5609	3.0571	4.345e-05	0.0036932
GO:0097485	neuron projection guidance	260	8.0773	2.5999	6.4351e-05	0.0046271
GO:0050769	positive regulation of neurogenesis	447	13.887	2.1603	6.5323e-05	0.0046271
GO:0198738	cell-cell signaling by wnt	459	14.259	2.1039	0.00010516	0.0063849
GO:0007215	glutamate receptor signaling pathway	90	2.796	3.9342	0.00010516	0.0063849
GO:0060560	developmental growth involved in morphogenesis	225	6.9899	2.5751	0.00023812	0.013493
GO:0048880	sensory system development	355	11.029	2.1762	0.00031244	0.016599
GO:0071900	regulation of protein serine/threonine kinase activity	497	15.44	1.943	0.00041342	0.020368
GO:0050808	synapse organization	385	11.961	2.0902	0.00043132	0.020368
GO:0061351	neural precursor cell proliferation	143	4.4425	2.9263	0.00051736	0.023145
GO:0035148	tube formation	145	4.5046	2.8859	0.00059071	0.025105
GO:0043062	extracellular structure organization	400	12.427	2.0118	0.00075231	0.029346
GO:0048568	embryonic organ development	423	13.141	1.9785	0.00075954	0.029346
GO:0001667	ameboidal-type cell migration	381	11.836	2.0277	0.00085574	0.030881
GO:0099072	regulation of postsynaptic membrane neurotransmitter receptor levels	65	2.0193	3.9617	0.00087192	0.030881
GO:0048144	fibroblast proliferation	84	2.6096	3.4488	0.001165	0.039583
GO:0001763	morphogenesis of a branching structure	196	6.089	2.4635	0.0012108	0.039583
GO:0007626	locomotory behavior	197	6.1201	2.4509	0.0012742	0.040114
GO:0001655	urogenital system development	326	10.128	2.0735	0.0013429	0.040766
GO:0016049	cell growth	473	14.694	1.8374	0.0017984	0.049672
GO:0031032	actomyosin structure organization	184	5.7162	2.4492	0.0018402	0.049672
GO:0042476	odontogenesis	126	3.9144	2.8102	0.0018942	0.049672
GO:0010975	regulation of neuron projection development	475	14.757	1.8297	0.0019093	0.049672
GO:0061458	reproductive system development	428	13.296	1.8802	0.0019284	0.049672
GO:0035264	multicellular organism growth	147	4.5668	2.6277	0.002127	0.053175
GO:0001764	neuron migration	151	4.691	2.5581	0.0026607	0.062833
GO:0001701	in utero embryonic development	345	10.718	1.9593	0.0026666	0.062833
GO:0048645	animal organ formation	61	1.895	3.6938	0.0027351	0.062833
GO:0060537	muscle tissue development	371	11.526	1.9088	0.0029372	0.065701
GO:0032623	interleukin-2 production	63	1.9572	3.5766	0.0032896	0.071697
GO:0003158	endothelium development	117	3.6348	2.7512	0.0034998	0.07437
GO:0051056	regulation of small GTPase mediated signal transduction	331	10.283	1.945	0.0036218	0.075085
GO:0030534	adult behavior	141	4.3804	2.5112	0.0045368	0.091817
GO:0048732	gland development	434	13.483	1.78	0.0047052	0.093009
GO:0007015	actin filament organization	388	12.054	1.8252	0.0049928	0.094851
GO:0031346	positive regulation of cell projection organization	365	11.339	1.852	0.0051087	0.094851
GO:0090596	sensory organ morphogenesis	250	7.7666	2.0601	0.0051331	0.094851
GO:0048010	vascular endothelial growth factor receptor signaling pathway	87	2.7028	2.9599	0.0055898	0.099368
GO:0032147	activation of protein kinase activity	321	9.9723	1.9053	0.0056114	0.099368
